# Supplementary material for: COVID-19 lockdowns highlight a risk of increasing ozone pollutionin European urban areas
Source: Copernicus journal article supplement (doi:10.5194/acp-2020-1171), 2020-11-16
Supplement: Supplementary file [file acp-2020-1171-AC1-supplement.pdf]

**Author responses to reviewers' comments of acp-2020-1171 (COVID-19 lockdowns highlight a risk of increasing ozone pollution in European urban areas)**

January 29, 2021

Stuart K. Grange\*, James D. Lee, Will S. Drysdale, Alastair C. Lewis,  
Christoph Hueglin, Lukas Emmenegger, and David C. Carslaw

\*[stuart.grange@empa.ch](mailto:stuart.grange@empa.ch)

**Response to reviewers**

**Anonymous Referee #1**

This paper analyzed the effect of the European COVID-19 lockdowns on NO<sub>2</sub>, O<sub>3</sub>, and O<sub>x</sub> concentrations by comparing the observation and business as usual (BAU) derived from machine learning at 246 stations. The lockdown effect was determined by the Bayesian change point models. This analyze gave an 34% reduction of NO<sub>2</sub> concentration and 30% increase of O<sub>3</sub> leading to little change in O<sub>x</sub>. Therefore, the change in NO<sub>2</sub> and O<sub>3</sub> is mainly a repartitioning of O<sub>x</sub>. This paper presents a timely and important analysis of evaluating the lockdown impact on air quality in Europe. The paper is well written and structured. I suggest the authors to consider the following comments, which may help to improve the paper.

[Thank you for your positive comments and suggestions for improvements. Please see the itemised responses below.](#)

**General comments**

1. The description of methods are not detailed enough. Although most of the methods are used and described in previous studies, more detail information, for example about how the calculation of BAU, is useful for the reader to understand the data processing. There are some references provided to show how to perform the data analysis but are written in a specific programming language. The fundamental description in the paper would be helpful in case some of the readers are not using this tool.

[We have expanded the methods section to describe the method's approach further. The previous papers we have references give comprehensive details on the methods used and therefore, here, we focus on explaining the calculation of the business as usual scenario.](#)

[The new text now reads:](#)

[“The philosophy of this approach involves using a machine learning model, trained on past data, to predict beyond the last observations it has seen. The model is trained on a](#)

long enough period, two years in this work, to capture the variability of concentrations experienced in a variety of meteorological conditions. Beyond the training period (February, 14, 2020), the model predicts concentrations based on meteorological variables which from the model's perspective are from the future. The time series which results is a *counterfactual*. This counterfactual represents an estimate of concentrations during a business as usual (BAU) scenario. The BAU concentrations can be readily compared with what was observed for example, Figure 3 and the changes quantified, explained, and interpreted. This allows for a robust comparison with what was expected with what was observed."

2. The input and output of random forest model is hourly data. This is different from Grange et al. (2018), where daily averaged data was used. Why is the change? If hourly data is used, I am not sure how well the model captures the lockdown effect if the variability is mainly contributed by diurnal variation. Also, it would be very helpful to show the performance of the BAU calculation in a time series plot in their absolute concentration, perhaps in the supplement. The current comparison is only show in Fig A1 with some averaged  $R^2$  is not enough. At least the performance for different countries should be show individually unless the model performances are the same. The calculation of  $O_x$  BAU is not clear. Is it calculated from the  $O_x$  observation like  $NO_2$  and  $O_3$ , or the sum of  $NO_2\_BAU$  and  $O_3\_BAU$ ?

Hourly data were used because (a), they result in more performant models when compared to lower resolution models, chiefly because explanatory variables such as wind direction have far more information at higher resolution and (b), these hourly data are available for the analysis time period. Grange et al. (2018) analysed  $PM_{10}$  data over a much longer period and these data were collected by gravimetric samplers and therefore, were at daily resolution.

We agree that additional  $O_3$  metrics (such as rolling 8-hour means) might capture some attributes which maybe somewhat hidden by the mean response. However, we would argue that the mean response of all species is the most important metric and will represent the changes in concentrations well.

Displaying the sites' time series is not practical in a publication such as this. However, we have provided an example time series in concentration units in Figure 3. Figure 3 very clearly demonstrates the counterfactual divergence from the observed concentrations.

We agree that the lack of model error statistics was a weakness in the manuscript. We have addressed this by replacing Figure A1 with a more comprehensive version (also below in Figure 1). The new figure shows Pearson's correlation coefficient ( $r$ ), mean bias

(MB), normalised mean bias (NMB), and normalised root mean square error (NRMSE) for all sites' models for the training and validation periods.

The O<sub>x</sub> modelling was indeed done with observational data like NO<sub>2</sub> and O<sub>3</sub>. This statement was missing in the manuscript and has been edited:

"... random forest models were trained to explain hourly mean NO<sub>2</sub>, O<sub>3</sub>, and O<sub>x</sub> concentrations using surface meteorological and time explanatory variables for each monitoring site."

3. The argument of ozone pollution need for evidence to support. As discussed in section 3.5, the increase in O<sub>3</sub> is mainly a repartitioning of O<sub>x</sub> during the lockdown. The O<sub>x</sub>/O<sub>3</sub>/NO<sub>2</sub> concentrations were missing so I cannot tell from the paper itself if all O<sub>x</sub> are in the form of O<sub>3</sub>, will O<sub>3</sub> exceed the limit? This is a rough estimation assuming only repartitioning play a role. As mentioned in the paper, the ozone formation is nonlinear with VOC and NO<sub>x</sub> and Europe is likely in the VOC-limited regime. Reduction in NO<sub>x</sub> do not lead to higher O<sub>3</sub> formation. If the reduction in NO<sub>x</sub> is stronger than lockdown in the future, ozone production could move to NO<sub>x</sub>-limited regime, which ozone pollution less important.

The reviewer rightly emphasizes the non-linear nature of its production involving NO<sub>x</sub> and VOCs. However, the focus of the current study is constrained to urban areas including roadside locations, rather than regional scale rural locations. To understand this issue more fully at a European scale would require air quality modelling. However, as shown in Figure 6, O<sub>x</sub> concentrations varied little at background and traffic sites in comparison with either NO<sub>2</sub> or O<sub>3</sub>. As discussed elsewhere in the paper, (and shown Figure 6), there is more evidence of O<sub>x</sub> concentrations decreasing at traffic sites, which can be attributed to reductions in the primary emission of NO<sub>2</sub>.

### Technical comments

1. Line 109: The model prediction is corrected by -3.7ug for NO<sub>2</sub>. How much you result sensitive to this correction.

We apologise, but we do not understand this question. However, we believe that what is being asked is "how sensitive are your results to the bias correction applied to NO<sub>2</sub>".

The correction applied resolved the systematic underprediction of NO<sub>2</sub> due to already lower emissions before the lockdowns were officially implemented — see response to Line 112 below where the use of a correction is used primarily to support a consistent representation of changes relative to a specific date.

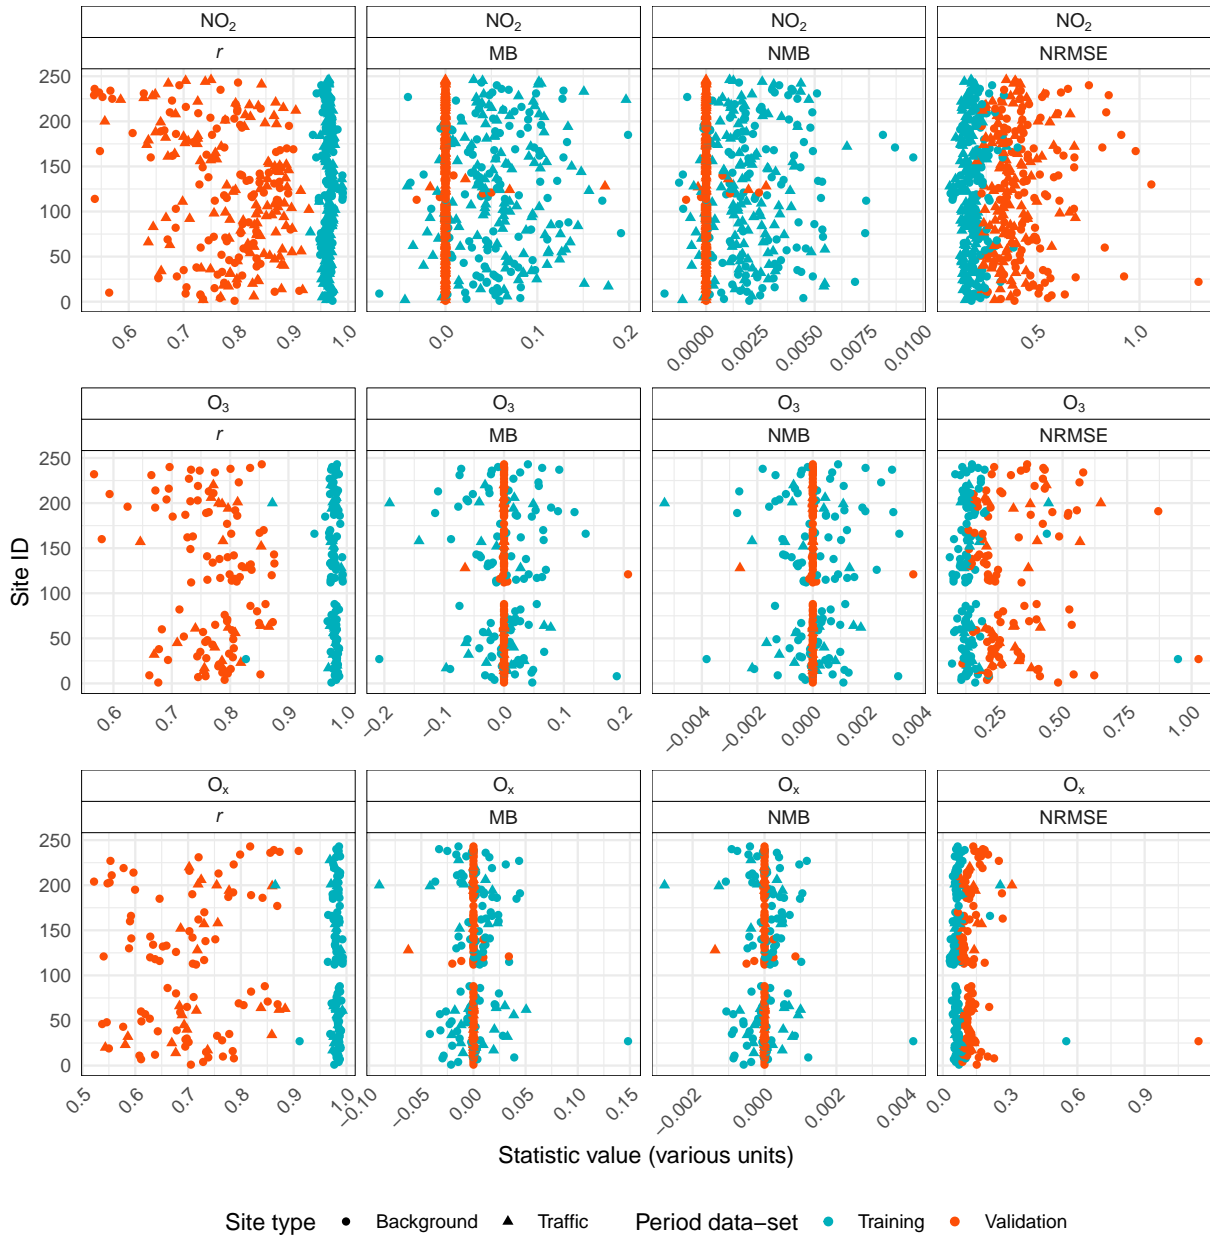

Figure 1: Model error summaries for all monitoring sites' (coded as integers)  $\text{NO}_2$ ,  $\text{O}_3$ , and  $\text{O}_x$  models for two datasets – the training and validation sets. The error summaries are Pearson's correlation coefficient ( $r$ ), mean bias (MB; in  $\mu\text{g m}^{-3}$ ), normalised mean bias (NMB), and normalised root mean square error (NRMSE). The normalised were normalised by the observed mean.

2. Line 112: The underprediction of NO<sub>2</sub> is attributed to mild temperature and windy conditions. Isn't this indicating the model is not able to predict the condition in 2020?

A substantial component of the under prediction would be due to already curtailed economic activity and therefore, emissions before the introduction of lockdowns, and is primarily used to provide a consistent basis for quantifying the changes relative to a specific point in time. The bias correction mostly resolved these issues and the model performance was very good (see Figure A1). The random forest modelling approach used has limitations on what it can achieve. The under prediction of NO<sub>2</sub> 2020 can be partially explained by the rather unusual weather conditions experienced in the spring of 2020 which the model could not represent perfectly.

3. Line 210–213: The projection of NO<sub>2</sub> reduction and O<sub>3</sub> increase in the future is assuming a linear trend, which seems to me a bit too simple. Especially calculating the year to reach the lockdown impact bothers me.

The goal of these calculations and discussion was put the changes observed in 2020 into context – they do not have the objective of being predictions. We have added a sentence explicitly stating this:

“These calculations have not been done to predict future concentrations, only to put the changes experienced between March and July, 2020 in context.”

The abstract has also been slightly edited for clarity around this point.

4. Line 229–230: This sentence is not clear.

We have edited for this sentence for clarity and it now reads:

“The roadside increment in NO<sub>2</sub> above urban background concentrations diminished considerably over lockdown due to large reductions in vehicle activity.”

5. Line 233: maybe you want to refer your argument to table 1.

Done

6. Line 274: I think better to state the access of both NO and NO<sub>2</sub> data.

Done.

## Referee: Shaojun Zhang Referee #2

Grange et al. utilized time-series random forest models to analyze the changes of NO<sub>2</sub> and O<sub>3</sub> concentrations caused by the COVID-19 lockdowns across European countries. This work has important findings from the natural experiment of atmospheric pollution that most urban areas in Europe is in the VOC-limited scheme of O<sub>3</sub> formation (e.g., at least in Spring). Therefore, only mitigating traffic NO<sub>x</sub> emissions might bring in unwanted increase of urban O<sub>3</sub>. Overall, the manuscript is well organized, and the data analysis is solid and consistent.

Thank you for your positive comments. Please see the itemised responses below.

1. Line 29: I suggest add the explanation of the evaluation metric of Google mobility; e.g., the search frequency of points of interest, or the visit frequency (or duration spent) at points of interest?

The Google mobility data is highly anonymised and only reports “movement trends” in contrast to a baseline. The text and the figure caption has been altered to clearly explain this:

“Google’s mobility data (Google, 2020) based on movement trends very effectively demonstrates the change in mobility based on a baseline (Figure 1).”

2. Line 36: Please reconsider the wording “near-minimum”. I suppose commercial, transportation and recreation activities would be drastically declined, and the impact on essential industrial sectors would be less substantial.

The text has been altered and now reads:

“The European lockdowns can be thought of and approached as an air quality ‘experiment’ where economic activity was substantially curtailed where commercial, transportation, and recreation activities drastically declined.”

3. Line 57: Please describe the distance between traffic sites and urban-BG sites in the selected urban areas. I wonder whether these traffic sites in various European countries would be deployed based on a unified, clear principle (e.g., distance to road curb, daily traffic volume)? Or, consider to enhance the statement around Line 70.

We have calculated the distances among the different urban-traffic and urban-background sites within each urban area. The mean and median distances among the sites in an urban area was 5.2 and 3.9 km respectively. Therefore, the majority of the sites were in rather close proximity to one another and offer good comparisons to one another. The text has been updated to reflect this:

“The mean distance among the different air quality monitoring sites within an urban area was 5.2 km.”

The site-type classification was done on the data contained in the European Air Quality e-Reporting (AQER) database. Although the classifications of the sites may contain differences among the authorities supplying data to AQER database, efforts are made to apply the same classification system among all member states.

4. Line 65: Please briefly describe how to match air quality and weather sites in this study.

The text has been updated to describe the matching logic:

“ The matching logic between the air quality and meteorological sites was simple. The nearest ISD site to a particular air quality site was determined, the observations queried, and tested to ensure the data record was complete for the analysis period.”

5. Line 104: It is not clear, in Figure A1, whether the distribution of  $R^2$  represents the interval of  $R^2$  (minimum to maximum) for each site-specific RF model? In addition to  $R^2$ , other validation metrics like normalized mean error can be used to evaluate the average discrepancy between modelled and observed results. And, I am surprised that both  $\text{NO}_2$  and  $\text{O}_3$  share good model validation results but  $\text{O}_x$  has lower  $R^2$ . What are the possible reasons and implications?

Figure A1 has been replaced with a more comprehensive version to address the limited information supplied in the original manuscript (see Figure 1 and Referee #1’s second general comment). The updated version displays more metrics, including normalised mean bias and normalised root mean square error.

It is indeed interesting to see that the predictive performance of  $\text{O}_x$  is somewhat lower than  $\text{NO}_2$  and  $\text{O}_3$ . This can be explained by  $\text{O}_x$  displaying less of a diurnal cycle than other pollutants. The somewhat invariant concentrations result in the “hour” variable having less information gain when compared to the other modelled variables.

6. Line 109: what is the percentage of underestimation.

The mean percentage change has now been added to the text:

“The under-prediction was on average,  $-3.7 \mu\text{g m}^{-3}$  (95 % CI: [-4.2, -3.3]; mean percentage change: 15.9 %).”

7. Line 147: What is the possible cause (from the perspective of atmospheric chemistry or model validation performance) of comparable  $\text{O}_3$  concentrations in the late period of this analysis to the business-as-usual levels, while  $\text{NO}_2$  concentrations still indicated some degree of  $\text{NO}_x$  emission reduction?

We believe that actual NO<sub>2</sub> and NO<sub>x</sub> emissions remained lower than the business-as-usual scenarios across Europe until the end of July, 2020. The difference between the observed and predicted NO<sub>2</sub> concentrations at traffic sites was greater than the urban-background sites. This suggests that traffic emissions are mostly responsible for this. Despite the reduction in emissions, there was still adequate NO<sub>x</sub> in European urban atmospheres to generate business-as-usual O<sub>3</sub> concentrations by the end of the analysis period (July 31, 2020).

8. Line 170: I consider the less correlated relationship between lockdown date and O<sub>3</sub> surge possible is because O<sub>3</sub> is a more regional pollutant than NO<sub>2</sub> (high contribution from regional transport). I wonder how about analyzing the maximum daily average 8-hr instead of all O<sub>3</sub> observations?

We also believe that analysing additional O<sub>3</sub> metrics may provide some value. However, analysing the mean response is the most useful and provides consistency with the other species included in the analysis. The extension of the analysis to additional O<sub>3</sub> metrics would be better handled in future work and studies.

9. Line 185: Is there any supporting mobility data to verify the actual change of mobility activities in Germany and Switzerland vs. in France and Italy?

The stringency indices (Figure A2) indicate that the countries such as France and Italy had a more strict collection of policies when compared to other countries such as Germany and Switzerland. The © Google's mobility also support this (Figure 2).

10. Line 205: Please consider to add the increase of maximum daily average 8-hr ozone concentrations.

Please see our above response to question/point 8.

11. Line 210: The authors has strong assumptions that the future reduction pace of NO<sub>2</sub> would follow that in the past decade, and the O<sub>3</sub> increase would greatly relate to the change of traffic emissions. I am not very confident with these assumptions. In particular, O<sub>3</sub> pollution is a regional issue, and is relevant to emission controls not only for NO<sub>x</sub> but also for VOCs (e.g., deeper mitigation of NO<sub>x</sub> might lead to O<sub>3</sub> reduction). Similar concern for the statement in the abstract (e.g., the predicted situation in 2028).

The same question has been asked by Referee #1 (technical comment 3). The goal of these calculations and discussion was put the changes observed in 2020 into context – they do not have the objective of being predictions. We have added a sentence explicitly stating



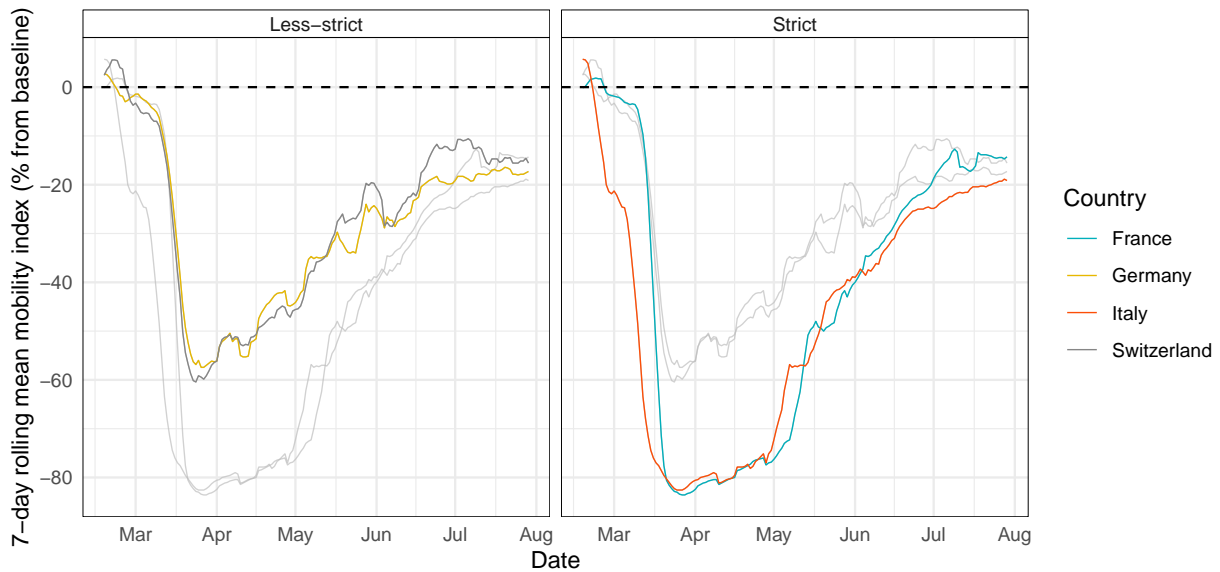

Figure 2: © Google’s mobility indices between February and July, 2020 for four selected countries split by subjective groups.

this:

“These calculations have not been done to predict future concentrations, only to put the changes experienced between March and July, 2020 in context.”

12. Line 265: and biogenic VOCs emissions.

Done.

13. Figure A3. What are the measurement methods and data reliability of VOC concentrations?

The observations displayed in Figure A3 were gained from the Automatic Hydrocarbon Network. This network uses automatic gas chromatographs to report real-time speciated hydrocarbons. These data are reported to the European Commission and are considered high-quality. For more information, please visit <https://uk-air.defra.gov.uk/networks/network-info?view=hc>.

## Other changes

- The data file which was provided as a temporary link has been migrated to a persistent data repository (<https://doi.org/10.5281/zenodo.4464734>). This repository is now referenced in text and in the data availability section.
- Three additional references have been added which report air quality changes due to COVID-19 lockdown measures.
- Table 1 had a formatting error which resulted in duplicate rows. This has been fixed.

# COVID-19 lockdowns highlight a risk of increasing ozone pollution in European urban areas

Stuart K. Grange<sup>1,2</sup>, James D. Lee<sup>2</sup>, Will S. Drysdale<sup>2</sup>, Alastair C. Lewis<sup>2,3</sup>, Christoph Hueglin<sup>1</sup>, Lukas Emmenegger<sup>1</sup>, and David C. Carslaw<sup>2,4</sup>

<sup>1</sup>Empa, Swiss Federal Laboratories for Materials Science and Technology, Überlandstrasse 129, 8600 Dübendorf, Switzerland

<sup>2</sup>Wolfson Atmospheric Chemistry Laboratories, University of York, York, YO10 5DD, United Kingdom

<sup>3</sup>National Centre for Atmospheric Science, University of York, Heslington, York, YO10 5DD, United Kingdom

<sup>4</sup>Ricardo Energy & Environment, Harwell, Oxfordshire, OX11 0QR, United Kingdom

**Correspondence:** Stuart K. Grange ([stuart.grange@empa.ch](mailto:stuart.grange@empa.ch)); David C. Carslaw ([david.carslaw@york.ac.uk](mailto:david.carslaw@york.ac.uk))

## Abstract.

In March 2020, non-pharmaceutical interventions in the form of lockdowns were applied across Europe to urgently reduce the transmission of SARS-CoV-2, the virus which causes the COVID-19 disease. The ~~near-complete shutdown of the aggressive curtailment of the~~ European economy had widespread impacts on atmospheric composition, particularly for nitrogen dioxide ( $\text{NO}_2$ ) and ozone ( $\text{O}_3$ ). To investigate these changes, we analyze data from 246 ambient air pollution monitoring sites in 102 urban areas and 34 countries in Europe between February and July, 2020. Counterfactual, business as usual air quality time series are created using machine learning models to account for natural weather variability. Across Europe, we estimate that  $\text{NO}_2$  concentrations were 34 and 32 % lower than expected for traffic and urban-background locations while  $\text{O}_3$  was 30 and 21 % higher (in the same environments) at the point of maximum restriction on mobility. ~~The European urban experienced in the-~~ To put the 2020 changes in context, average  $\text{NO}_2$  trends since 2010 were calculated, and the changes experienced across European urban areas in 2020 ~~lockdown~~ was equivalent to ~~that 7.6 years of average  $\text{NO}_2$  reduction (or concentrations which might be anticipated in 2028~~ based on average trends since 2010. ~~Despite-~~ Despite  $\text{NO}_2$  concentrations decreasing by approximately a third, total oxidant ( $\text{O}_x$ ) changed little, suggesting that the reductions of  $\text{NO}_2$  were substituted by increases in  $\text{O}_3$ . The lockdown period demonstrated that the expected future reductions in  $\text{NO}_2$  in European urban areas are likely to lead to ~~a widespread increase in urban-~~ widespread increases in urban  $\text{O}_3$  pollution unless additional mitigation measures are introduced.

## 1 Introduction

On December 31, 2019, a cluster of unexplained pneumonia cases in Wuhan, Hubei, China was reported to the World Health Organization (WHO) (World Health Organization (WHO), 2020a; Wu et al., 2020). Subsequent research in January, 2020 identified the disease to be caused by a previously unknown betacoronavirus (SARS-CoV-2), and the disease was given the name coronavirus disease 2019 (COVID-19) (Zhou et al., 2020; World Health Organization (WHO), 2020c). Due to rapid human-to-human transmission and the introduction of the virus to countries outside China, cases of COVID-19 were soon

detected in all continents of the world, with the exception of Antarctica, and on March 11, the WHO declared a COVID-19 pandemic (World Health Organization (WHO), 2020b).

25 Europe was named the epicentre of the pandemic on March 13, and most European countries undertook unprecedented non-pharmaceutical interventions to reduce the transmission rate of SARS-CoV-2 in early or mid-March (BBC, 2020; Dehning et al., 2020; Remuzzi and Remuzzi, 2020). The exact nature and duration of the measures varied by country, but collectively they are often referred to as “lockdowns” (Ruktanonchai et al., 2020). The lockdowns generally resulted in the closure of all shops, schools, universities, and restaurants with the exception of supermarkets, pharmacies, and other services deemed  
30 essential. Working from home whenever possible was encouraged and some countries also controlled, or restricted travel, exercise, and leisure activities. All these measures created a situation where European economic activity was reduced to a bare minimum within a matter of days and mobility of the European population was severely altered. [© Google’s mobility data \(© Google, 2020\) based on movement trends very effectively demonstrates the change in mobility based on a baseline](#) (Figure 1).

35 The rapid reduction of economic activity had many positive environmental impacts with the improvement of air quality being widely reported, especially via striking satellite observations of column [NO<sub>2</sub>](#) (Liu et al., 2020; Patel et al., 2020; Venter et al., 2020). Reductions of [CO<sub>2</sub>](#) emissions have also been reported globally due to heavily curtailed economic activities (Le Quéré et al., 2020; Forster et al., 2020). Many of the reports of improved air quality were preliminary, and further research was required to fully understand and quantify the improvements observed throughout Europe, particularly after accounting for meteorologi-  
40 cal factors (~~Grange et al., 2020; Carslaw, 2020; Lee et al., 2020; Wang et al., 2020~~) ([Grange et al., 2020; Carslaw, 2020; Lee et al., 2020; V](#)

The European lockdowns can be thought of and approached as an air quality ‘experiment’ where economic activity was ~~curtailed to near-minimum levels~~ [substantially curtailed where commercial, transportation, and recreation activities drastically declined](#). Questions can be asked from the data such as: what were the results, how do they compare to other planned interven-  
45 tions such as low emission or clean air zones, and whether the observations were inline with what would be expected? The rate and severity of the changes imposed on European populations due to the lockdowns is something that previously could only be investigated by atmospheric modeling. Therefore, the COVID-19 lockdowns have provided a unique ‘real-world modeling scenario’ which represents a plausible future with far fewer internal combustion engine vehicles in use across Europe.

Here, we report an analysis based on counterfactual business as usual scenarios using predictive machine learning models.  
50 This allows for robust comparisons of the observed concentrations of air pollutants with those which would have been expected without the lockdown measures. The primary objective of this study is to report the response of ~~and~~ [NO<sub>2</sub> and O<sub>3</sub>](#) concentrations throughout European urban areas caused by mobility restrictions due to COVID-19 lockdown measures. A secondary objective is to outline the implications for European air quality management which the dramatic changes in population mobility exposed.

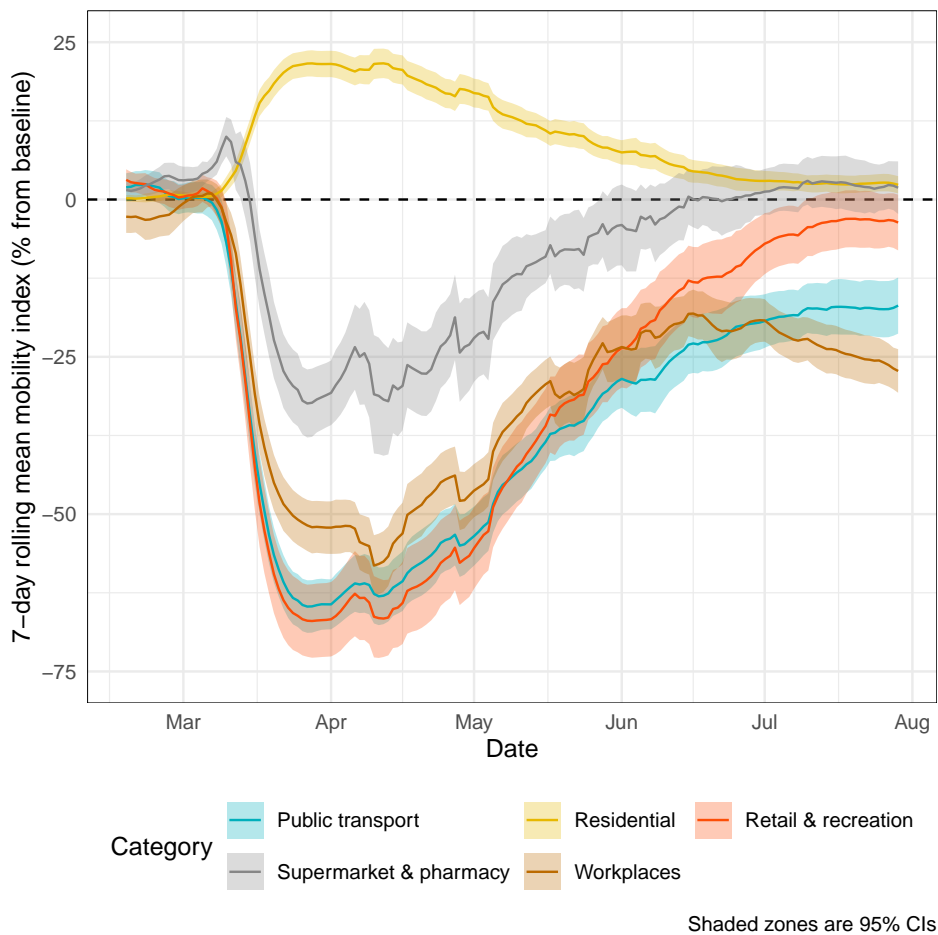

**Figure 1.** European mobility changes based on © Google’s mobility indices between February and July, 2020 (© Google, 2020). [The metrics display movement trends based on a baseline.](#)

## 2 Materials and methods

### 55 2.1 Data

Up-to-date (UTD) hourly ~~and motioning~~ [NO<sub>2</sub> and O<sub>3</sub> monitoring](#) data were retrieved from the European Air Quality Portal (European Environment Agency, 2019) for the period between 2018 and 2020 for 102 urban areas in 33 European countries (Figure 2). For the 34th country, the United Kingdom, observations were directly retrieved from the countries’ individual (England, Wales, and Scotland) and national networks (Automatic Urban and Rural Network; AURN) (Department for Environment  
60 Food & Rural Affairs, 2020).

The 102 urban areas were chosen because they are the capital, a “principal”, or a particularly relevant city for the included European countries (Figure 2). In each urban area, at least one representative traffic site and at least one urban-background

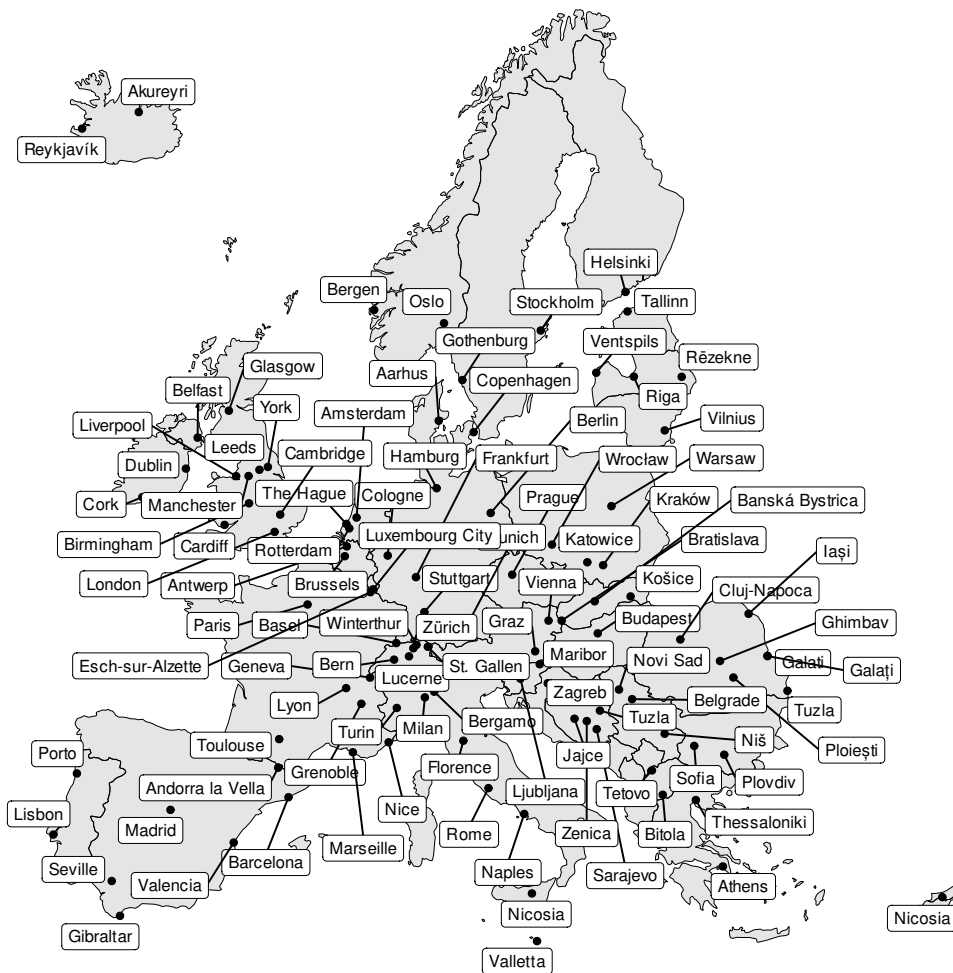

© OpenStreetMap contributors. Distributed under a Creative Commons BY-SA License

**Figure 2.** The 102 European urban areas included in the data analysis.

site were chosen (if available) to represent the area. The mean distance among the different air quality monitoring sites within an urban area was 5.2 km. Notably, UTD data are not validated, are subject to change, and will only be finalised (at the time

65 of writing) in 4+9 months time (the deadline is September, 2021). However, the time series were screened for undesirable features such as calibration issues, frequent missing data, or long periods of no reported data. Time series with such obvious issues were not included in the analysis. Unfortunately, oxides of nitrogen ( $\text{NO}_x = \text{NO}_2 + \text{NO}$ ) data were not available because most countries which participate in the UTD process do not report  $\text{NO}_x$  (or NO) since it is not a regulated, ambient pollutant in Europe (Grange, 2019). Additionally, total oxidant ( $\text{O}_x = \text{NO}_2 + \text{O}_3$ ) was calculated (in ppb) and included in the analysis as

70 a third variable.

Hourly surface-based meteorological data were downloaded from the Integrated Surface Database (ISD). For the 102 urban areas, these sites were generally airports (NOAA, 2016; Grange, 2020). The matching logic between the air quality and meteorological sites was simple. The nearest ISD site to a particular air quality site was determined, the observations queried, and tested to ensure the data record was complete for the analysis period. If this criterion was met, the site match was positive and used for the analysis. A total of 246 air quality monitoring sites and 91 meteorological sites were included in the analysis. For details of the sites, see the ~~tables available online~~<sup>3</sup>table provided in an accompanying, persistent data repository (Grange, 2021).

In the current work, we focus on changes in the concentrations of ~~and~~NO<sub>2</sub> and O<sub>3</sub> at urban-traffic and urban-background locations. ~~and~~NO<sub>2</sub> and O<sub>3</sub> in such locations are strongly influenced by local road vehicle emissions and not, for example, trans-boundary contributions, which would be the case for particulate matter (PM<sub>2.5</sub> and PM<sub>10</sub>). Furthermore, the concentrations of ~~and~~NO<sub>2</sub> and O<sub>3</sub> in urban areas are strongly influenced by local meteorological effects. Generally, traffic sites are located in close proximity to roads, and pollutant concentrations are forced by local vehicular emissions. The urban-background classification is more varied, but can be thought as environments away from the immediate vicinity of roads and industrial facilities but are still located within an urban area.

## 85 2.2 Business as usual (BAU) modeling

A central issue when considering changes in atmospheric concentrations due to an intervention is whether the change is due to variations in meteorological conditions or emission source strength (Grange and Carslaw, 2019). This problem is widespread and affects time scales from hours to years. It is particularly important in ‘before-after’ studies where meteorological change, rather than changes in emission source strength, can easily dominate the variation in concentrations. This ambiguity can be somewhat reduced by averaging over several years to account for past inter-annual variability. However, this approach cannot account for the significant impact that meteorology may have on a specific observation period.

In the current context of the changes in activities brought about by COVID-19 lockdowns, the changes are over a duration of several months, and span a period from spring to summertime conditions. This period straddles important natural changes in meteorological conditions and atmospheric composition. For example, during February, 2020 the UK and much of western Europe experienced exceptionally high mean wind speeds due to storms Ciara, Dennis, and Jorge. Surface wind speed records in Southern England suggest February, 2020 had the highest mean wind speed of any month for over 40 years. This demonstrates that the state of the atmospheric dispersion across Europe at the time of COVID-19 lockdowns was different than experienced in previous years. Similarly, urban-background concentrations of O<sub>3</sub> in the northern hemisphere tend to increase from the beginning of the year and peak in April, which will also influence NO<sub>2</sub> (Monks, 2000). These, and other factors suggest that considerable care is needed for the quantification of an intervention such as the COVID-19 lockdowns on surface concentrations of primary and secondary pollutants.

To address the above issues, random forest models were trained to explain hourly mean ~~and~~NO<sub>2</sub>, O<sub>3</sub>, and O<sub>x</sub> concentrations using surface meteorological and time explanatory variables for each monitoring site (Breiman, 2001). The explanatory

---

<sup>3</sup>~~Temporary location:-~~

variables used were: wind direction, wind speed, air temperature, relative humidity, atmospheric pressure (if available in the  
105 ISD database), a trend term in the form of Unix date, a seasonal term in the form of Julian day, weekday, and hour of day.  
The following random forest hyper-parameters were kept constant for all models: 300 trees, three variables to split at each  
node, and a minimal node size of five. The training period spanned just over two years and was between January 1, 2018 and  
February 14, 2020. The training-testing split percentage was 80 and 20 respectively. From February 14 to July 31, 2020, the  
models were used in predictive mode to predict pollutant concentrations based on the observed meteorological variables.

110 The ~~models' predictions can be thought of as business as usual (BAU) scenarios based on past behaviour of pollutant  
concentrations and the weather which was experienced after February~~ philosophy of this approach involves using a machine  
learning model, trained on past data, to predict beyond the last observations it has seen. The model is trained on a substantially  
long period, two years in this work, to capture the variability of concentrations experienced in a variety of meteorological  
conditions. Beyond the training period (February, 14~~at each monitoring site. Thus, 2020~~), the model ~~represents~~ predicts  
115 concentrations based on meteorological variables which from the model's perspective are from the future. The time series  
which results is a ~~counterfactual~~ which observed. This counterfactual represents an estimate of concentrations during a business  
as usual (BAU) scenario. The BAU concentrations can be ~~compared with~~ (readily compared with what was observed for exam-  
ple, see-Figure 3 ) and the changes quantified, explained, and interpreted. This allows for a robust comparison with what was  
expected, with what was observed.

120 February 14 to March 1, 2020 was considered a validation period where the models' skill were checked for adequate perfor-  
mance. Summaries of the models' performance metrics based on the ~~random forest model objects and predictions during the  
validation period in the form of  $R^2$~~  training and validation periods are shown in Figure A1. From the start date of the lockdowns  
(the earliest was March 9 in Italy), the application period began and gave estimates of BAU, *i.e.*, what concentrations would  
have been if the lockdown measures were not implemented. The modeling was conducted using the **rmweather** R package  
125 (Grange et al., 2018; Grange and Carslaw, 2019; Grange, 2018).

During the validation phase, a number of models showed bias in prediction, most notably, NO<sub>2</sub> was under-predicted at many  
locations. The under-prediction was on average  $-3.7 \mu\text{g m}^{-3}$  (95 % CI: [-4.2, -3.3]; mean percentage change: 15.9 %). This  
under-prediction was most likely caused by already-curtailed economic activity and reduced emissions throughout Europe at  
the very end of February and the beginning of March, *i.e.*, before the formal lockdowns were implemented. The beginning of  
130 2020 was also mild in respect to ambient temperature and rather windy at most locations (discussed above) which may have  
resulted in some models under-predicting concentrations at this time of the year. For consistency and to create a reference point  
in time, the model predictions were corrected by calculating the model offset validation phase (February 14 to March 1) and  
subtracting this offset from the predictions. This ensured that the counterfactual predictions were calibrated at the start of the  
application phase and represented the changes in concentrations after March 1, 2020.

### 135 2.2.1 Change point analysis

To link ~~and~~ NO<sub>2</sub>, O<sub>3</sub>, and O<sub>x</sub> concentration changes in March–April, 2020 to the lockdown restrictions placed on European  
populations, change point models were calculated. These change point models were conceptually simple – an intercept change



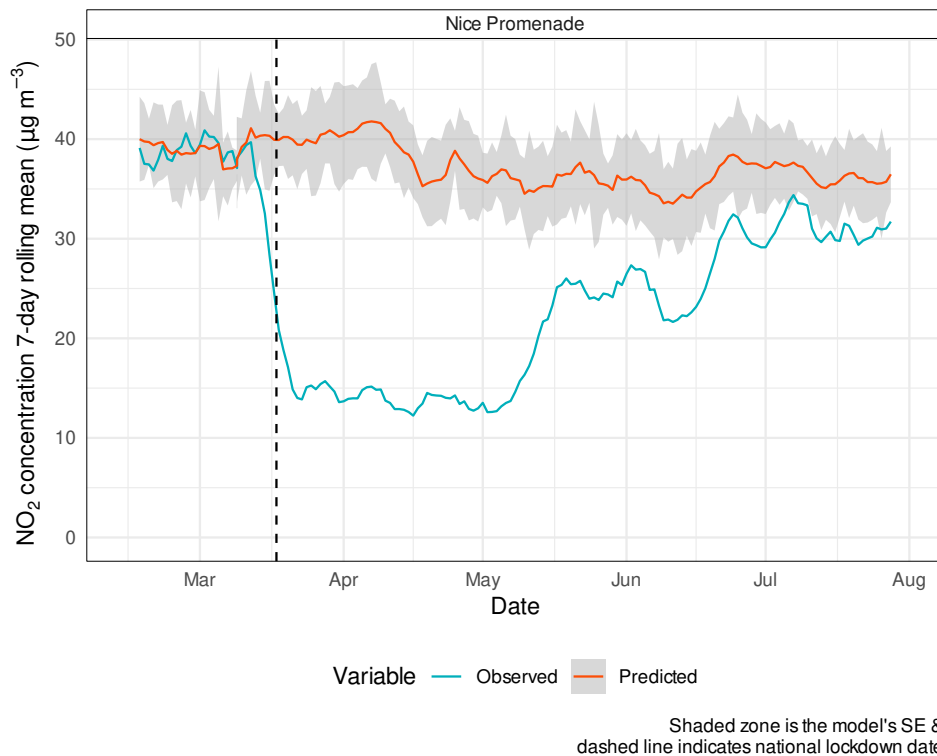

**Figure 3.** A [NO<sub>2</sub>](#) example where the observed concentrations clearly diverged from the business as usual (BAU) scenario for the Nice Promenade (France) traffic monitoring site between February and July, 2020.

was the expected *a priori* assumption. There were two motivations for these change point models. The first was to identify both the time, and magnitude of concentration response with an objective, data-driven approach rather than using a subjective and manual classifier. The second was to use such a technique to identify an atmospheric response after an intervention (an unplanned one in this case) which is a general goal of air quality data analysis.

The change point logic was implemented with the **mcp** R package with Bayesian inference (Lindeløv, 2020). To detect the change points, three Markov chains were run with 9000 iterations. The change point models tested the delta between the observed and counterfactual, however, the change-points were calibrated back to their pre-lockdown concentrations to conduct the (relative) percentage change calculations.

### 2.2.2 Presentation of results

When presenting the results of the analysis, most time series are displayed as seven-day rolling means. These rolling means act as a smoothing filter to make patterns clearer and remove the day-to-day variations generally seen in air quality monitoring data. Thirty-four countries were included in the analysis (Figure 2), but to avoid overwhelming plots and figures, a consistent set

150 of six European countries (France, Germany, Italy, Spain, Switzerland, and the United Kingdom) were chosen to be displayed when discussing the counties' air quality patterns.

### 3 Results and discussion

#### 3.1 Mean concentration changes

For all 34 European countries analysed, the observed concentrations of  $\text{NO}_2$  were lower than those predicted by the counterfactual business as usual (BAU) scenarios between February 14 and July 31, 2020 (deltas ( $\Delta$ ) between the observed concentrations and predicted counterfactual shown in Figure 4). The reductions of  $\text{NO}_2$  were greater in both an absolute and relative sense at the sites classified as either roadside or traffic environments compared to urban-background locations which can be explained by  $\text{NO}_2$  being primarily a traffic-sourced pollutant (Grange et al., 2017). The impacts of vehicle-flow reductions during the lockdowns were more dramatic in the close proximity of roads when compared to more distant urban-background locations.

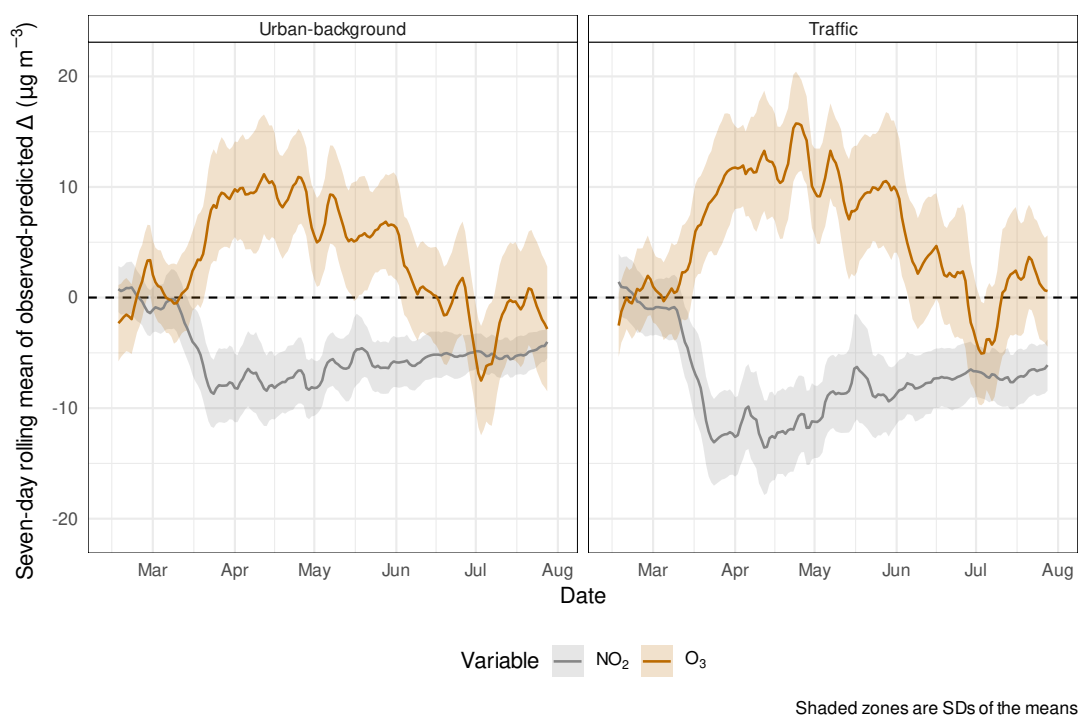

**Figure 4.** Seven-day rolling means of the observed-predicted concentrations deltas for  $\text{NO}_2$  and  $\text{O}_3$  for all European sites analysed between February 14 and July 31, 2020.

160 Mean  $\text{O}_3$  concentrations increased at a similar magnitude to which  $\text{NO}_2$  decreased throughout Europe between February and July, 2020 (Figure 4). Like  $\text{NO}_2$ ,  $\text{O}_3$  at roadside locations showed a greater divergence from the BAU predictions than urban-background sites. The near-mirror image of  $\text{NO}_2$  and  $\text{O}_3$  can be explained by the relationship between  $\text{NO}_x$  and  $\text{O}_3$ .

The reduction of  $\text{NO}_x$  emissions and concentrations across Europe drove decreased  $\text{O}_3$  destruction via the NO titration cycle during this period. In many countries, the 8-hour legal limit for  $\text{O}_3$  of  $120 \mu\text{g m}^{-3} 8 \text{ h}^{-1}$  was breached during this time period. Unlike  $\text{NO}_2$  where concentrations remained below their BAU estimates until the end of the analysis period,  $\text{O}_3$  concentrations returned to their expected values by the end of July, 2020.

### 3.2 Timing of changes

Figure 4 clearly indicates that concentrations in the first half of 2020 diverged from what was predicted by the counterfactual modelling. To objectively identify the date and magnitude of maximum divergence, change points were identified with a data-driven approach using Bayesian inference. The mean dates when  $\text{NO}_2$  started to diverge at their greatest extent from the BAU scenarios along with national lockdown dates for six European countries are displayed in Figure 5. For the complete set of dates for all countries included in the analysis, see Table A1.

For  $\text{NO}_2$ , the change points were between seven days before and seven days after the countries' lockdown date (excluding the outlier of Denmark). For  $\text{O}_3$ , this range was greater, between -12 and 8 days. Italy was the first country in Figure 5 where change points were identified for  $\text{NO}_2$  concentrations on March 13, 2020 and this was four days before Italy's nationwide lockdown date while Spain's  $\text{NO}_2$  change point was the same as the country's lockdown date. Change points were often identified a day or two earlier than the lockdown date when the lockdown began on a Sunday or a Monday, for example, in Germany. For almost every site included in the analysis, the change points for  $\text{NO}_2$  were ones of decreases while those for  $\text{O}_3$  were increases (as seen in Figure 4).

Figure 5 shows that some countries had very consistent changes in concentrations for the sites which were analysed, for example Spain. Changes in other countries were less consistent which may indicate regional differences within countries. The UK showed two peaks in density for the  $\text{NO}_2$  change points which were separated by a week. This feature represents a two-phase reduction in emissions because staggered lockdown measures were announced – the first was a set of recommendations for social distancing and not visiting restaurants and other social establishments (on March 16), while the second announcement (March 23) was one of a more strict lockdown.

Although the identified change point dates for  $\text{NO}_2$  were broadly consistent with the various countries' lockdown dates, the change points for  $\text{O}_3$  were not aligned as closely (Table A1). There was also no correlation between the magnitude of  $\text{NO}_2$  reduction and the time required for an  $\text{O}_3$  change point to be identified. This suggests that  $\text{O}_3$ 's secondary generation processes did not immediately respond to reductions of ambient  $\text{NO}_x$  concentrations after lockdowns were imposed due to less NO titration. For this process to be identifiable,  $\text{O}_3$  generation must occur, and this requires sunlight. Therefore, the lack of sunny conditions in some urban areas around the time of the  $\text{NO}_2$  atmospheric response may have resulted in varying duration lags before changes in  $\text{O}_3$  could be observed.

### 3.3 Concentration changes among different countries

At a European level, maximum divergence of  $\text{NO}_2$  and  $\text{O}_3$  from the counterfactual predictions was reached in late-March, 2020 (Figure 4). However, there was some diversity among European country  $\text{NO}_2$  and  $\text{O}_3$  divergence from their counter-

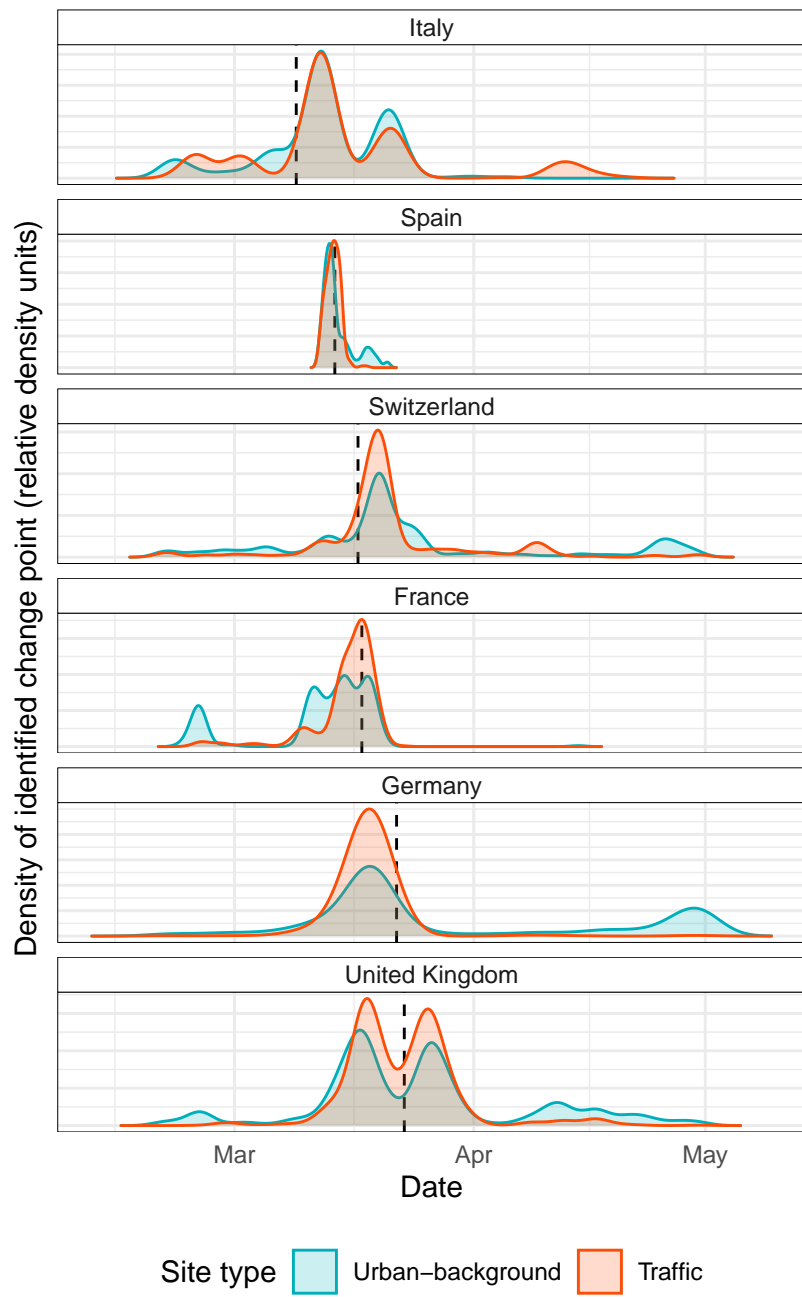

Vertical dashed lines are dates of nationwide lockdowns

**Figure 5.** Estimated timing of changes to  $\text{NO}_2$  concentrations for six European countries between March and May, 2020. The distribution shown for each country is the dimensionless probability distribution of the estimated change-point in concentration. The country panels are ordered by nationwide lockdown date.

factuals for the analysis periods (Figure 6). All countries analysed passed their maximum divergences for ~~and~~  $\text{NO}_2$  and  $\text{O}_3$  in late-April, and the shape of the recovery is of a “swoosh” with a sharp plunge away from the counterfactual around the date of the lockdown implementations (Figure 6), but the rapid plunge was followed by a slower, and more gradual return to the BAU until the end of July. This pattern is very much reminiscent of the mobility changes shown in Figure 1.

200 Some countries experienced a smaller reduction in  $\text{NO}_2$  than others. Germany and Switzerland for example, experienced lower  $\text{NO}_2$  reductions when compared to France, Italy, and Spain. Some countries’ greater reductions in ambient  $\text{NO}_2$  concentrations could be explained by the level of “stringency” of the countries’ lockdowns and resulting changes in mobility (Hale et al., 2020; © Google, 2020). For example, Germany and Switzerland’s measures were very strong recommendations with few legally enforceable restrictions on recreational or leisure activities, while France, Italy, and Spain had more stringent  
205 requirements where movement and travel were restricted and enforced in a much stronger manner. It is very likely that these different levels (or enforcement) of restrictions had implications for emissions of atmospheric pollutants. However, meteorological conditions, perhaps similar synoptic scale patterns likely played a role in the differences observed among the countries too.

After late-April, concentrations moved towards their predicted counterfactual values and this continued to the end of the  
210 analysis period (Figure 6). Some European countries began to remove lockdown restrictions in the second half of April which increased traffic-sourced emissions, and this is consistent with the observations in Figure 4 and Figure 6.  $\text{O}_3$  concentrations returned to approximately their BAU levels by the end of July, but  $\text{NO}_2$  had yet to do so at the end of the analysis period, with the exception of Italy. This indicates that  $\text{NO}_x$  emissions (mostly traffic-sourced) had not yet reached their estimated BAU levels by the end of July across most of Europe after the country lockdowns were released.

### 215 3.4 Quantifying the changes in concentrations

The change point dates identified by Bayesian inference shown in Figure 5 and Table A1 were used to classify the time series as pre-lockdown, within lockdown, or post-lockdown periods. With this classification, concentrations were compared to calculate concentration deltas and percentage changes. At a European level, the mean  $\text{NO}_2$  percentage changes for  $\text{NO}_2$  at traffic and urban-background sites were -34 % (95 % CI [-36, -31]) and -32 % (95 % CI [-35, -29]) respectively (which  
220 equalled concentration reductions of -11 and  $-7 \mu\text{g m}^{-3}$ ). The European annual  $\text{NO}_2$  standard is  $40 \text{ y}^{-1} \mu\text{g m}^{-3} \text{ y}^{-1}$ , and the mean reduction of  $11 \mu\text{g m}^{-3}$  is 27 % of the legal limit (European Commission, 2019). For  $\text{O}_3$ , the mean European percentage change for traffic and urban-background sites were estimated at 30 % (95 % CI [26, 35]) and 21 % (95 % CI [18, 24]), and the concentration changes were 12 and  $9 \mu\text{g m}^{-3}$  respectively. The concentration deltas and percentage changes attributed to the European lockdown measures are listed by country and site type in Table 1.

225 ~~To put these concentration changes into context, and trend analysis between 2010 and 2019 for the 246 sites was conducted. Based on the sites which had a complete data record, the mean trends were  $-1.44$  and  $-0.72 \text{ y}^{-1}$  for at traffic and urban-background locations, while trends in the same environments were  $0.2$  and  $0.49 \text{ y}^{-1}$ . Therefore, at the roadside, the mean reduction of across Europe due to the COVID-19 lockdown measures was equivalent to that of 7.6 years of continued concentration reduction, or~~

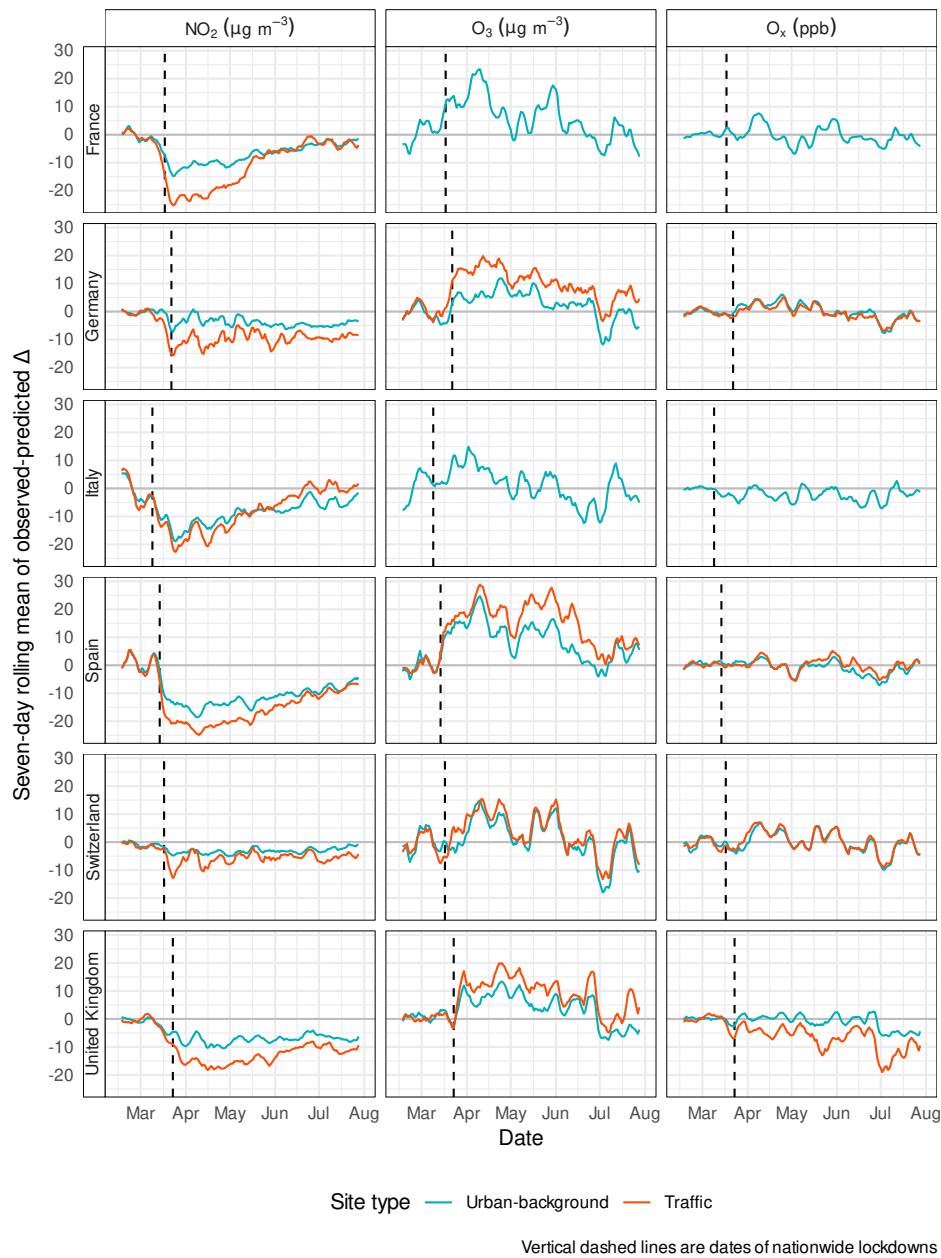

**Figure 6.** Seven-day rolling means of the observed-predicted concentrations deltas for  $\text{NO}_2$ ,  $\text{O}_3$ , and  $\text{O}_x$  for six selected countries in Europe between February 14 and July 31, 2020.

230 equivalent to the anticipated European atmosphere in 2028 (-); however, increased at an equivalent of 17 years of the rate of change determined by trend analysis in urban-background locations.-

Mean European roadside trend with the reduction of concentrations attributed to the COVID-19 lockdowns put in context.-

235 The changes at traffic sites will strongly reflect the influence of changes in traffic activity in close proximity to each site for  $\text{NO}_x$  and  $\text{O}_3$ . Close to roads, the origins of  $\text{NO}_2$  can be thought of as the combination of a background component, a component which is generated from the fast reaction between vehicular  $\text{NO}$  emissions and  $\text{O}_3$ , and directly emitted (primary). The primary contribution is known to have decreased in recent years from a peak around 2010. In London for example, the analysis of 35 traffic-influenced sites showed a reduction in the mean  $\text{NO}_2/\text{NO}_x$  vehicle emission ratio from around 25% in 2010 to about 15% in 2014, (Carslaw et al., 2016) while at a European level, the  $\text{NO}_2/\text{NO}_x$  emission ratio peaked at 16% (also in 2010) (Grange et al., 2017). This decrease is believed to be driven by improvements in selective catalytic reduction control systems used on vehicles to reduce  $\text{NO}_x$  and also to the effect of ageing of diesel oxidation catalysts (Carslaw et al., 2019).

240 The decrease in primary emissions over the past decade would have acted to reduce ambient concentrations close to roads. Indeed, if the traffic reductions experienced across Europe through country-wide lockdowns had occurred closer to 2010, the reductions in road vehicle emissions would have been much more important in affecting ambient concentrations than was experienced in early 2020.

245 To put these concentration changes into context,  $\text{NO}_2$  and  $\text{O}_3$  trend analysis between 2010 and 2019 for the 246 sites was conducted. Based on the sites which had a complete data record, the mean trends were  $-1.44$  and  $-0.72 \mu\text{g m}^{-3} \text{y}^{-1}$  for  $\text{NO}_2$  at traffic and urban-background locations, while  $\text{O}_3$  trends in the same environments were  $0.2$  and  $0.49 \mu\text{g m}^{-3} \text{y}^{-1}$ . Therefore, at the roadside, the mean reduction of  $\text{NO}_2$  across Europe due to the COVID-19 lockdown measures was equivalent to that of 7.6 years of continued concentration reduction, or equivalent to the anticipated European atmosphere in 2028 (Figure 7).  $\text{O}_3$  however, increased at an equivalent of 17 years of the rate of change determined by trend analysis in urban-background locations. These calculations have not been done to predict future concentrations, only to put the changes experienced between March and July, 2020 in context.

255 The changes at traffic sites will strongly reflect the influence of changes in traffic activity in close proximity to each site for  $\text{NO}_x$ ,  $\text{NO}_2$  and  $\text{O}_3$ . Close to roads, the origins of  $\text{NO}_2$  can be thought of as the combination of a background component, a component which is generated from the fast reaction between vehicular  $\text{NO}$  emissions and  $\text{O}_3$ , and directly emitted (primary)  $\text{NO}_2$ . The primary  $\text{NO}_2$  contribution is known to have decreased in recent years from a peak around 2010. In London for example, the analysis of 35 traffic-influenced sites showed a reduction in the mean  $\text{NO}_2/\text{NO}_x$  vehicle emission ratio from around 25% in 2010 to about 15% in 2014, (Carslaw et al., 2016) while at a European level, the  $\text{NO}_2/\text{NO}_x$  emission ratio peaked at 16% (also in 2010) (Grange et al., 2017). This decrease is believed to be driven by improvements in selective catalytic reduction control systems used on vehicles to reduce  $\text{NO}_x$  and also to the effect of ageing of diesel oxidation catalysts (Carslaw et al., 2019).

260 The decrease in primary  $\text{NO}_2$  emissions over the past decade would have acted to reduce ambient  $\text{NO}_2$  concentrations close to roads. Indeed, if the traffic reductions experienced across Europe through country-wide lockdowns had occurred closer to 2010, the reductions in road vehicle  $\text{NO}_2$  emissions would have been much more important in affecting ambient concentrations than was experienced in early 2020.

265 The posterior draws (a type of model prediction) from the change point models show that in some countries, the **reduction decrease** of traffic volumes during the COVID-19 lockdowns reduced  $\text{NO}_2$  concentrations to those which are experienced at

**Table 1.** Mean concentration deltas/differences and percentage changes of NO<sub>2</sub>, O<sub>3</sub>, and O<sub>x</sub> for different countries and site types attributed to COVID-19 lockdown measures in March, 2020. Values which are missing indicates that there were not data and NC indicate no change point was identified.

| Country                | Site type   | NO <sub>2</sub>         |          | O <sub>3</sub>          |          | O <sub>x</sub> |          |
|------------------------|-------------|-------------------------|----------|-------------------------|----------|----------------|----------|
|                        |             | Δ (μg m <sup>-3</sup> ) | % change | Δ (μg m <sup>-3</sup> ) | % change | Δ (ppb)        | % change |
| Andorra                | Traffic     | –                       | –        | –                       | –        | –              | –        |
| Andorra                | Urban-back. | -19.8                   | -59.7    | 16.1                    | 43.0     | -3.4           | -9.8     |
| Austria                | Traffic     | -7.6                    | -24.5    | –                       | –        | –              | –        |
| Austria                | Urban-back. | -5.2                    | -23.1    | 11.3                    | 19.5     | 4.3            | 11.2     |
| Belgium                | Traffic     | -10.8                   | -45.3    | 5.0                     | 10.5     | -2.2           | -6.5     |
| Belgium                | Urban-back. | -9.5                    | -38.4    | 8.9                     | 19.2     | 2.4            | 6.5      |
| Bosnia and Herzegovina | Traffic     | –                       | –        | –                       | –        | –              | –        |
| Bosnia and Herzegovina | Urban-back. | -1.8                    | -11.9    | 1.4                     | 15.0     | -1.3           | -3.4     |
| Bulgaria               | Traffic     | -13.8                   | -29.5    | 14.0                    | 29.6     | 0.9            | 2.2      |
| Bulgaria               | Urban-back. | -10.4                   | -34.2    | 13.9                    | 33.6     | 3.0            | 8.4      |
| Croatia                | Traffic     | -16.2                   | -42.3    | –                       | –        | –              | –        |
| Croatia                | Urban-back. | -12.4                   | -43.9    | 21.5                    | 34.1     | 4.4            | 9.6      |
| Cyprus                 | Traffic     | -15.3                   | -47.0    | –                       | –        | -2.8           | -7.2     |
| Cyprus                 | Urban-back. | -16.7                   | -59.7    | 6.1                     | 10.9     | -5.0           | -11.8    |
| Czechia                | Traffic     | NC                      | NC       | –                       | –        | –              | –        |
| Czechia                | Urban-back. | NC                      | NC       | 9.0                     | 18.3     | 4.9            | 13.8     |
| Denmark                | Traffic     | -6.7                    | -28.0    | 15.7                    | 31.7     | 3.9            | 9.8      |
| Denmark                | Urban-back. | -4.2                    | -49.0    | 7.6                     | 12.3     | 3.1            | 8.4      |
| Estonia                | Traffic     | -5.0                    | -35.2    | 0.7                     | 1.3      | -1.8           | -5.2     |
| Estonia                | Urban-back. | -2.4                    | -29.2    | 6.4                     | 10.7     | -0.4           | -1.2     |
| Finland                | Traffic     | -9.4                    | -42.5    | –                       | –        | –              | –        |
| Finland                | Urban-back. | -4.3                    | -34.1    | –                       | –        | –              | –        |
| France                 | Traffic     | -20.3                   | -54.2    | –                       | –        | –              | –        |
| France                 | Urban-back. | -11.2                   | -44.1    | 13.9                    | 35.0     | -4.9           | -12.1    |
| Germany                | Traffic     | -10.5                   | -29.3    | 15.1                    | 37.3     | 3.0            | 7.5      |
| Germany                | Urban-back. | -4.9                    | -21.6    | 8.8                     | 16.6     | 3.5            | 9.1      |
| Greece                 | Traffic     | -12.3                   | -37.1    | NC                      | NC       | -1.1           | -0.4     |
| Greece                 | Urban-back. | -9.5                    | -43.9    | NC                      | NC       | -3.8           | -8.5     |
| Hungary                | Traffic     | NC                      | NC       | –                       | –        | –              | –        |
| Hungary                | Urban-back. | NC                      | NC       | 5.0                     | 15.7     | -4.2           | -11.4    |
| Iceland                | Traffic     | -5.3                    | -33.7    | –                       | –        | –              | –        |
| Iceland                | Urban-back. | -3.4                    | -23.5    | –                       | –        | –              | –        |
| Ireland                | Traffic     | –                       | –        | NC                      | NC       | –              | –        |
| Ireland                | Urban-back. | -4.9                    | -33.6    | NC                      | NC       | -1.3           | -3.5     |
| Italy                  | Traffic     | -17.3                   | -31.9    | –                       | –        | –              | –        |
| Italy                  | Urban-back. | -12.5                   | -32.7    | 3.8                     | 14.1     | -1.5           | -2.2     |
| Lithuania              | Traffic     | -7.0                    | -25.9    | 13.8                    | 34.3     | 2.8            | 7.3      |
| Lithuania              | Urban-back. | -4.5                    | -21.0    | –                       | –        | –              | –        |
| Luxembourg             | Traffic     | -15.5                   | -53.2    | –                       | –        | –              | –        |
| Luxembourg             | Urban-back. | -10.3                   | -47.0    | 9.6                     | 17.0     | -0.1           | -0.3     |
| Malta                  | Traffic     | -13.2                   | -38.7    | 10.0                    | 15.4     | -4.1           | -8.1     |
| Malta                  | Urban-back. | –                       | –        | –                       | –        | –              | –        |
| Netherlands            | Traffic     | -6.2                    | -28.3    | NC                      | NC       | 1.3            | 3.5      |
| Netherlands            | Urban-back. | -3.5                    | -21.2    | NC                      | NC       | 4.1            | 11.2     |



**Table 1.** Continued.

| Country         | Site type   | NO <sub>2</sub>         |          | O <sub>3</sub>          |          | O <sub>x</sub> |          |
|-----------------|-------------|-------------------------|----------|-------------------------|----------|----------------|----------|
|                 |             | Δ (μg m <sup>-3</sup> ) | % change | Δ (μg m <sup>-3</sup> ) | % change | Δ (ppb)        | % change |
| North Macedonia | Traffic     | -8.6                    | -33.2    | NC                      | NC       | -1.9           | -6.8     |
| North Macedonia | Urban-back. | –                       | –        | NC                      | NC       | –              | –        |
| Norway          | Traffic     | -7.7                    | -30.0    | NC                      | NC       | –              | –        |
| Norway          | Urban-back. | -2.8                    | -17.1    | NC                      | NC       | 0.9            | 2.2      |
| Poland          | Traffic     | -11.7                   | -27.6    | –                       | –        | –              | –        |
| Poland          | Urban-back. | -3.6                    | -12.7    | 7.1                     | 15.1     | 2.1            | 5.5      |
| Portugal        | Traffic     | -25.9                   | -53.8    | 20.2                    | 46.8     | -10.7          | -24.6    |
| Portugal        | Urban-back. | -11.9                   | -40.5    | 13.8                    | 26.8     | 4.7            | 12.1     |
| Romania         | Traffic     | -5.8                    | -7.2     | –                       | –        | –              | –        |
| Romania         | Urban-back. | -7.5                    | -26.3    | 13.0                    | 39.9     | -0.5           | -0.5     |
| Serbia          | Traffic     | –                       | –        | –                       | –        | –              | –        |
| Serbia          | Urban-back. | -10.4                   | -56.4    | 15.6                    | 44.9     | -4.1           | -12.6    |
| Slovakia        | Traffic     | -6.8                    | -19.5    | –                       | –        | –              | –        |
| Slovakia        | Urban-back. | –                       | –        | –                       | –        | –              | –        |
| Slovenia        | Traffic     | -9.6                    | -30.5    | –                       | –        | –              | –        |
| Slovenia        | Urban-back. | -5.0                    | -18.9    | 20.9                    | 55.7     | 8.2            | 26.1     |
| Spain           | Traffic     | -22.8                   | -57.2    | 21.0                    | 61.9     | -1.5           | -2.8     |
| Spain           | Urban-back. | -16.4                   | -55.7    | 15.9                    | 37.5     | -2.2           | -5.4     |
| Sweden          | Traffic     | -4.9                    | -17.0    | –                       | –        | –              | –        |
| Sweden          | Urban-back. | -1.5                    | -12.5    | 6.5                     | 12.2     | 0.6            | 2.0      |
| Switzerland     | Traffic     | -5.5                    | -17.2    | 10.9                    | 22.1     | 5.1            | 13.0     |
| Switzerland     | Urban-back. | -3.3                    | -10.1    | 11.7                    | 21.7     | 5.2            | 14.4     |
| United Kingdom  | Traffic     | -14.4                   | -50.8    | 14.4                    | 45.8     | -3.8           | -8.3     |
| United Kingdom  | Urban-back. | -8.1                    | -36.8    | 8.0                     | 16.4     | 0.0            | 0.1      |

urban-background locations (United Kingdom shown in Figure 8). The roadside increment ~~or enhancement of was essentially eliminated by reducing traffic to the levels which were experienced while in the lockdown state~~ in NO<sub>2</sub> above urban background concentrations diminished considerably over lockdown due to large reductions in vehicle activity. However, as discussed above and shown in Figure 8, O<sub>3</sub> increased in response to the reductions of ~~and~~ NO<sub>2</sub> and O<sub>x</sub> only altered very slightly. The same patterns in the United Kingdom were also experienced in other European countries such as France and Spain, but were not as clear for counties such as Switzerland and Germany (Table 1).

### 3.5 O<sub>x</sub> – NO<sub>2</sub> and O<sub>3</sub> repartitioning

Figure 4 and Figure 6 demonstrate that NO<sub>2</sub> concentrations and emissions decreased throughout Europe due to the COVID-19 lockdown measures, especially at the roadside. However, the reduction of NO<sub>2</sub> was accompanied by an increase of O<sub>3</sub> at a similar magnitude and resulted in O<sub>x</sub> showing little change despite the large reductions in traffic-sourced NO<sub>2</sub> (for example, Figure 8).

Mean European changes in O<sub>x</sub> were variable between the two site environments. At traffic sites, O<sub>x</sub> decreased by -1 ppb (-1.8 %; 95 % CI [-4, 0.7]) while in urban-background locations, O<sub>x</sub> increased by 0.7 ppb (2.1 %; 95 % CI [-0.2, 4]). In the case of the traffic sites, the modest decrease of O<sub>x</sub> can be partially explained by decreased emissions of primary NO<sub>2</sub> (Grange

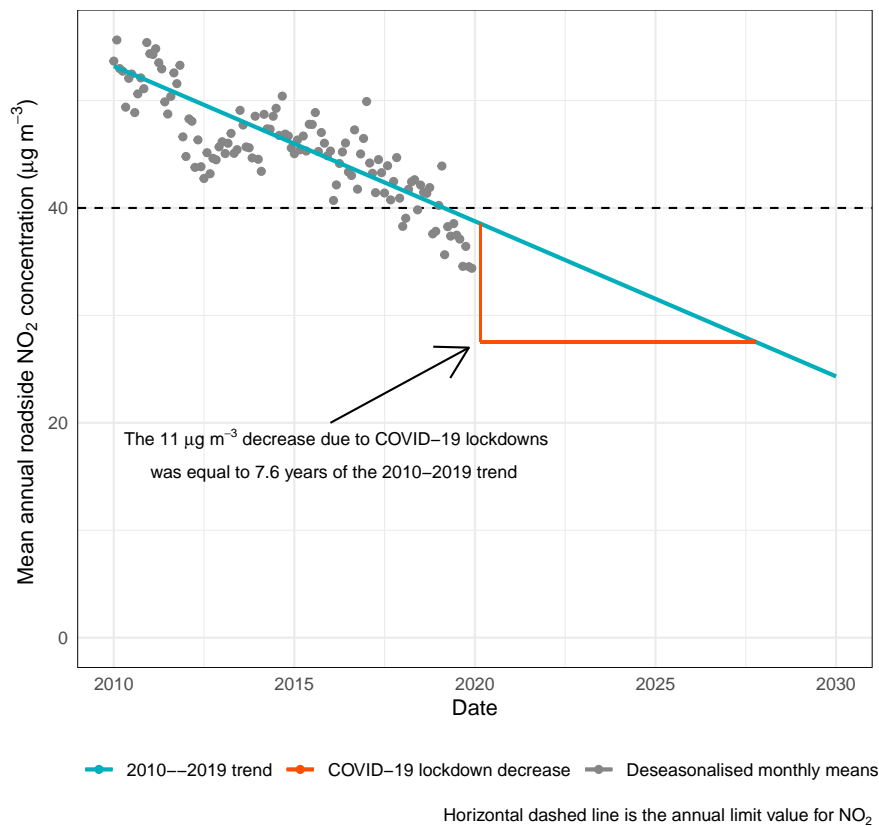

**Figure 7.** [Mean European roadside NO<sub>2</sub> trend with the reduction of NO<sub>2</sub> concentrations attributed to the COVID-19 lockdowns put in context.](#)

et al., 2017). However, in urban-background locations,  $O_x$  remained nearly constant. This is a very important observation for European air quality management. It suggests that the 34 % reduction of  $NO_2$  concentrations was equalled by a similar absolute increase in  $O_3$ , which is clearly an undesirable outcome because of the deleterious effects of  $O_3$  on population health, buildings, and vegetation.

285 The repartitioning of ~~to~~  $NO_2$  to  $O_3$  is of importance from a public health perspective. As Williams et al. (2014) argue, there are good reasons from an atmospheric chemistry perspective to consider ~~and~~  $NO_2$  and  $O_3$  together in epidemiological studies, rather than either of the two pollutants separately in single-pollutant models. Indeed, Williams et al. (2014) found that there were larger associations (on mortality) for mean 24 hour concentrations of  $O_x$  than for either ~~or~~  $O_3$  or  $NO_2$  individually. On this basis, the current analysis suggest that the health impacts may have been small because  $O_x$  concentrations changed little in  
 290 urban environments. The analysis conducted here was exclusively concerned with daily mean  $O_3$  concentrations, and does not explore the subtleties associated with peak and/or increases in daily minima  $O_3$  concentrations which are also important when considering the deleterious effects of  $O_3$ .

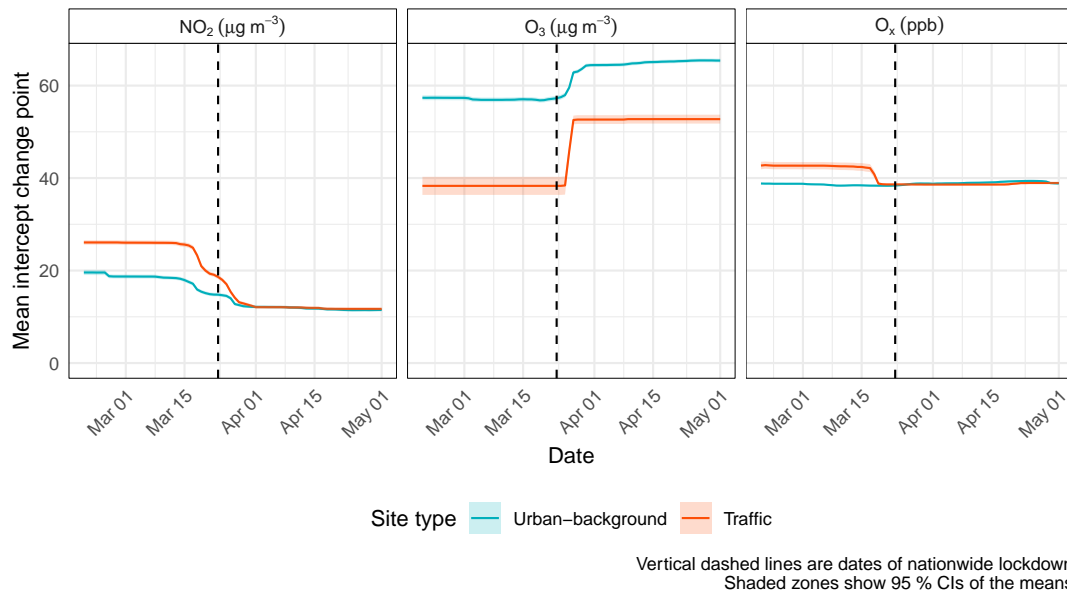

**Figure 8.** Posterior draws for  $\text{NO}_2$ ,  $\text{O}_3$ , and  $\text{O}_x$  two-intercept change point models for the United Kingdom between March and May, 2020.

Efficacious management of  $\text{O}_3$  has proven to be a challenge in Europe and in many other locations around the world (Sillman, 1999; Wang et al., 2017; Chang et al., 2017; Li et al., 2019). The struggle with  $\text{O}_3$  control is partly due to the highly non-linear chemistry of  $\text{O}_3$  production based on the precursors volatile organic compounds (VOCs) and  $\text{NO}_x$ . There are two regimes:  $\text{NO}_x$ -sensitive and VOC-sensitive – and the  $\text{O}_x$  analysis presented here strongly suggests that  $\text{O}_3$  production is overwhelmingly VOC-sensitive across urban Europe. Therefore, if higher  $\text{O}_3$  concentrations are to be avoided in the future where reductions in  $\text{NO}_x$  emissions of the scale seen in lockdown are likely, enhanced control of VOC emissions will be critical in the European urban environment. The prominence given to  $\text{NO}_2$  as a pollutant following the dieselgate scandal of 2015 (Anenberg et al., 2017) has led to far more ambitious  $\text{NO}_2$  emissions reductions policies in Europe than are currently in place for VOCs.

VOCs are only measured routinely in a few locations throughout Europe's urban areas, and represent a broad class of pollutant-pollutants that are emitted from a wide range of sources. Whilst in the 1980s and 1990s VOC emissions were dominated by gasoline vehicle emissions (both tailpipe and evaporative), in more recent years their abundance has become increasingly influenced by non-transport sources such as natural gas leakage, biogenic emissions, and wider solvent use (Lewis et al., 2020).

Data from the London Eltham site, the only suburban VOC monitoring site in the UK, indicates that for many VOCs lockdown did not lead to significant changes in overall emissions or atmospheric concentrations (Figure A3). A conclusion from this albeit anecdotal evidence would be that further reductions in only traffic-related VOC emissions would not likely generate the desired air quality improvements in  $\text{O}_3$  and that reducing emissions from other sectors would be essential.

Although out of scope for this current work, an obvious avenue for future research is to further explore how individual VOC concentrations responded during the lockdown periods in European urban areas in order to evaluate the proportion of VOCs

that still come from traffic. This, combined with chemical modelling on a species by species basis to fully assess  $O_3$  production chemistry, would help direct where future VOC reduction strategies should be focused. An analysis such as this would also strongly benefit from the access of  $NO_x$  (or NO as well as  $NO_2$ ) data which, arguably, would be a better pollutant to analyse than  $NO_2$  from an emissions perspective. We strongly encourage the institutions which are involved with reporting ambient air quality data to the European Environment Agency to include  $NO_x$  alongside the legally required  $NO_2$  observations for the air quality community.

#### 4 Conclusions

This work represents a classic air quality data analysis where atmospheric responses are linked to an intervention. In this case, the intervention was an unplanned, likely unique, and extreme event with very different characteristics when compared to typical interventions such as the introduction of new emission standards and low emission zones. Despite the extreme nature of the COVID-19 lockdowns and their results being much more impactful on urban atmospheric composition than other policies over a short time period, the analysis still demonstrates the difficulty of detecting “change upon change” for atmospheric pollutants – especially for locations where concentrations are close to background. However, this analysis presents a robust and portable framework for intervention analysis using a combination of machine learning-derived counterfactuals and change point analysis to identify the timing and magnitude of an atmospheric response.

Analysis of the effect of the European COVID-19 lockdowns on  $NO_2$ ,  $O_3$ , and  $O_x$  concentrations combining machine learning derived BAU modelling and Bayesian change point models indicate that  $NO_2$  concentrations reduced by 34 % at roadside locations. However, the widespread reductions of  $NO_2$  concentrations was accompanied by increases of  $O_3$  at a similar magnitude (30 %), and thus,  $O_x$  altered only very slightly due to the lockdowns when considering Europe as a whole.

This insight has important implications for the implementation of future air quality management policies. The COVID-19 lockdown conditions give a glimpse of a realistic, and indeed likely, future environment where  $NO_x$  emissions continue to reduce at their current rate, primarily because of the increasing stringency of vehicular emission standards (Carslaw et al., 2016; Grange et al., 2017). The future reduction of  $NO_x$  concentrations will likely result in repartitioning of  $O_x$  and the increase of  $O_3$  concentrations across most European urban areas. Although increases in European  $O_3$  concentrations have been acknowledged, the further rise should be pre-empted by the European air quality management community through increased focus on VOC emission controls and the more holistic combined management of  $NO_2$ ,  $O_3$ , and VOCs. This will allow for continued improvements to air quality in a general sense, rather than focusing on reductions of individual pollutants.

*Code and data availability.* The data sources used in this work are described and some data sets are publicly accessible in a persistent data repository (Grange, 2021, <https://doi.org/10.5281/zenodo.4464734>). Additional data and information are available from the authors on reasonable request.

*Author contributions.* SKG and DCC conceived the research questions, conducted the analysis, and wrote the manuscript. JDL, WSD, and ACL contributed to the research design and writing of the manuscript. CH and LE reviewed and contributed to the manuscript writing.

*Competing interests.* The authors declare no competing interest.

345 *Acknowledgements.* SKG is supported by the Swiss Federal Office for the Environment (FOEN) and the Natural Environment Research Council (NERC) while holding associate status at the University of York.

**Table A1.** Most commonly identified dates where observed and BAU modeled concentrations diverged in March, 2020. Dates which are missing indicates no change point was detected in March, 2020.

| Country                | Lockdown date                                                                       | <u>NO<sub>2</sub></u> date                                                        | <u>O<sub>3</sub></u> date                                                           |
|------------------------|-------------------------------------------------------------------------------------|-----------------------------------------------------------------------------------|-------------------------------------------------------------------------------------|
| Andorra                | Fri., Mar. 13, 2020                                                                 | Sat., Mar. 14, 2020                                                               | Thu., Mar. 19, 2020                                                                 |
| Austria                | Mon., Mar. 16, 2020                                                                 | Thu., Mar. 19, 2020                                                               | Mon., Mar. 16, 2020                                                                 |
| Belgium                | Wed., Mar. 18, 2020                                                                 | Sun., Mar. 15, 2020                                                               | Sat., Mar. 21, 2020                                                                 |
| Bosnia and Herzegovina | Sat., Mar. 21, 2020                                                                 | Thu., Mar. 19, 2020                                                               | Thu., Mar. 12, 2020                                                                 |
| Bulgaria               | Fri., Mar. 13, 2020                                                                 | Wed., Mar. 11, 2020                                                               | Wed., Mar. 18, 2020                                                                 |
| Croatia                | Thu., Mar. 19, 2020                                                                 | Fri., Mar. 20, 2020                                                               | Fri., Mar. 20, 2020                                                                 |
| Cyprus                 | Sun., Mar. 15, 2020                                                                 | Fri., Mar. 13, 2020                                                               | Thu., Mar. 19, 2020                                                                 |
| Czechia                | Mon., Mar. 16, 2020                                                                 |  | Fri., Mar. 20, 2020                                                                 |
| Denmark                | Fri., Mar. 13, 2020                                                                 | Fri., Mar. 27, 2020                                                               | Tue., Mar. 17, 2020                                                                 |
| Estonia                | Fri., Mar. 13, 2020                                                                 | Mon., Mar. 16, 2020                                                               | Sat., Mar. 21, 2020                                                                 |
| Finland                | Mon., Mar. 16, 2020                                                                 | Tue., Mar. 17, 2020                                                               |    |
| France                 | Tue., Mar. 17, 2020                                                                 | Sat., Mar. 14, 2020                                                               | Wed., Mar. 11, 2020                                                                 |
| Germany                | Sun., Mar. 22, 2020                                                                 | Sun., Mar. 22, 2020                                                               | Sat., Mar. 28, 2020                                                                 |
| Greece                 | Mon., Mar. 16, 2020                                                                 | Tue., Mar. 17, 2020                                                               |    |
| Hungary                | Mon., Mar. 16, 2020                                                                 |  | Sat., Mar. 14, 2020                                                                 |
| Iceland                | Mon., Mar. 16, 2020                                                                 | Sat., Mar. 14, 2020                                                               |    |
| Ireland                | Fri., Mar. 13, 2020                                                                 | Thu., Mar. 19, 2020                                                               |    |
| Italy                  | Mon., Mar. 09, 2020                                                                 | Fri., Mar. 13, 2020                                                               | Thu., Mar. 19, 2020                                                                 |
| Lithuania              | Mon., Mar. 16, 2020                                                                 | Tue., Mar. 17, 2020                                                               | Wed., Mar. 11, 2020                                                                 |
| Luxembourg             | Mon., Mar. 16, 2020                                                                 | Sat., Mar. 14, 2020                                                               | Fri., Mar. 20, 2020                                                                 |
| Malta                  | Sun., Mar. 22, 2020                                                                 | Sat., Mar. 14, 2020                                                               | Sun., Mar. 15, 2020                                                                 |
| Netherlands            | Mon., Mar. 16, 2020                                                                 | Mon., Mar. 16, 2020                                                               |  |
| North Macedonia        | Wed., Mar. 18, 2020                                                                 | Fri., Mar. 13, 2020                                                               |  |
| Norway                 | Thu., Mar. 12, 2020                                                                 | Tue., Mar. 17, 2020                                                               |  |
| Poland                 | Thu., Mar. 12, 2020                                                                 | Tue., Mar. 17, 2020                                                               | Tue., Mar. 24, 2020                                                                 |
| Portugal               | Wed., Mar. 18, 2020                                                                 | Sat., Mar. 14, 2020                                                               | Wed., Mar. 18, 2020                                                                 |
| Romania                | Mon., Mar. 16, 2020                                                                 | Sat., Mar. 21, 2020                                                               | Tue., Mar. 17, 2020                                                                 |
| Serbia                 | Sat., Mar. 21, 2020                                                                 | Tue., Mar. 17, 2020                                                               | Mon., Mar. 16, 2020                                                                 |
| Slovakia               | Mon., Mar. 16, 2020                                                                 | Sun., Mar. 22, 2020                                                               |  |
| Slovenia               | Mon., Mar. 16, 2020                                                                 | Thu., Mar. 12, 2020                                                               | Tue., Mar. 17, 2020                                                                 |
| Spain                  | Sat., Mar. 14, 2020                                                                 | Sat., Mar. 14, 2020                                                               | Sun., Mar. 15, 2020                                                                 |
| Sweden                 |  | Wed., Mar. 18, 2020                                                               | Fri., Mar. 20, 2020                                                                 |
| Switzerland            | Tue., Mar. 17, 2020                                                                 | Sun., Mar. 22, 2020                                                               | Thu., Mar. 26, 2020                                                                 |
| United Kingdom         | Mon., Mar. 23, 2020                                                                 | Mon., Mar. 23, 2020                                                               | Thu., Mar. 26, 2020                                                                 |

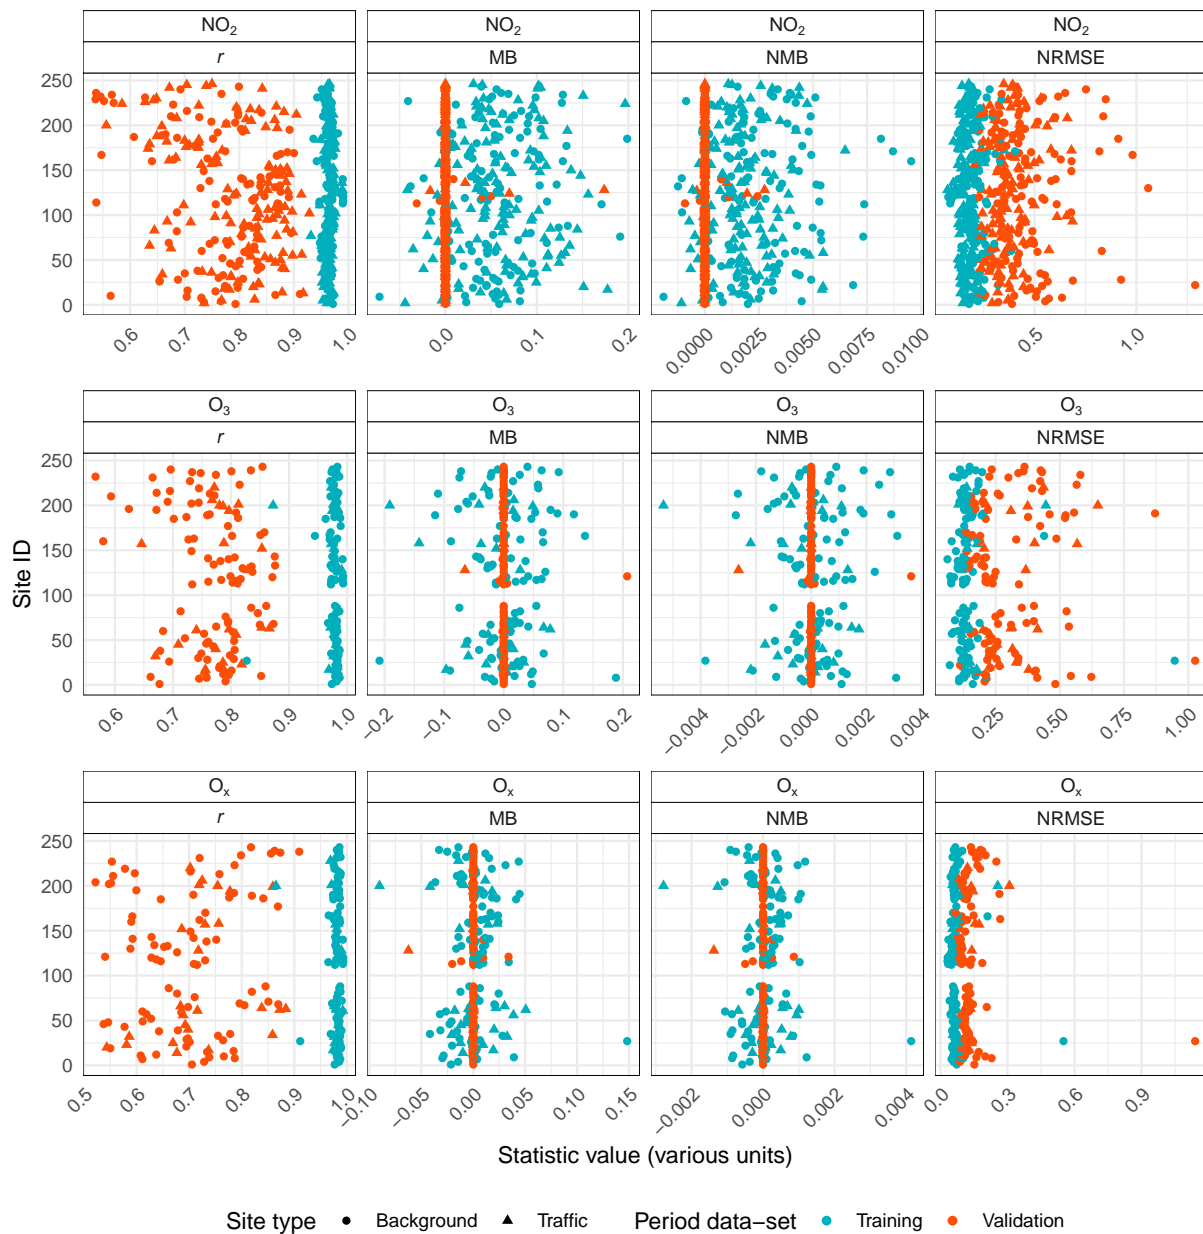

**Figure A1.** ~~Summaries of  $R^2$  values from the random forest model objects~~ Model error summaries for all monitoring sites' (coded as integers)  $\text{NO}_2$ ,  $\text{O}_3$ , and  $\text{O}_x$  models for ~~predictions during two datasets – the model-training and validation period sets.~~ The error summaries are Pearson's correlation coefficient (February 14 to March 1 $r$ ), 2020 mean bias (MB; in  $\mu\text{g m}^{-3}$ ) for ~~, normalised mean bias (NMB), and normalised root mean square error (NRMSE).~~ The normalised were normalised by the ~~three predicted variables~~ observed mean.

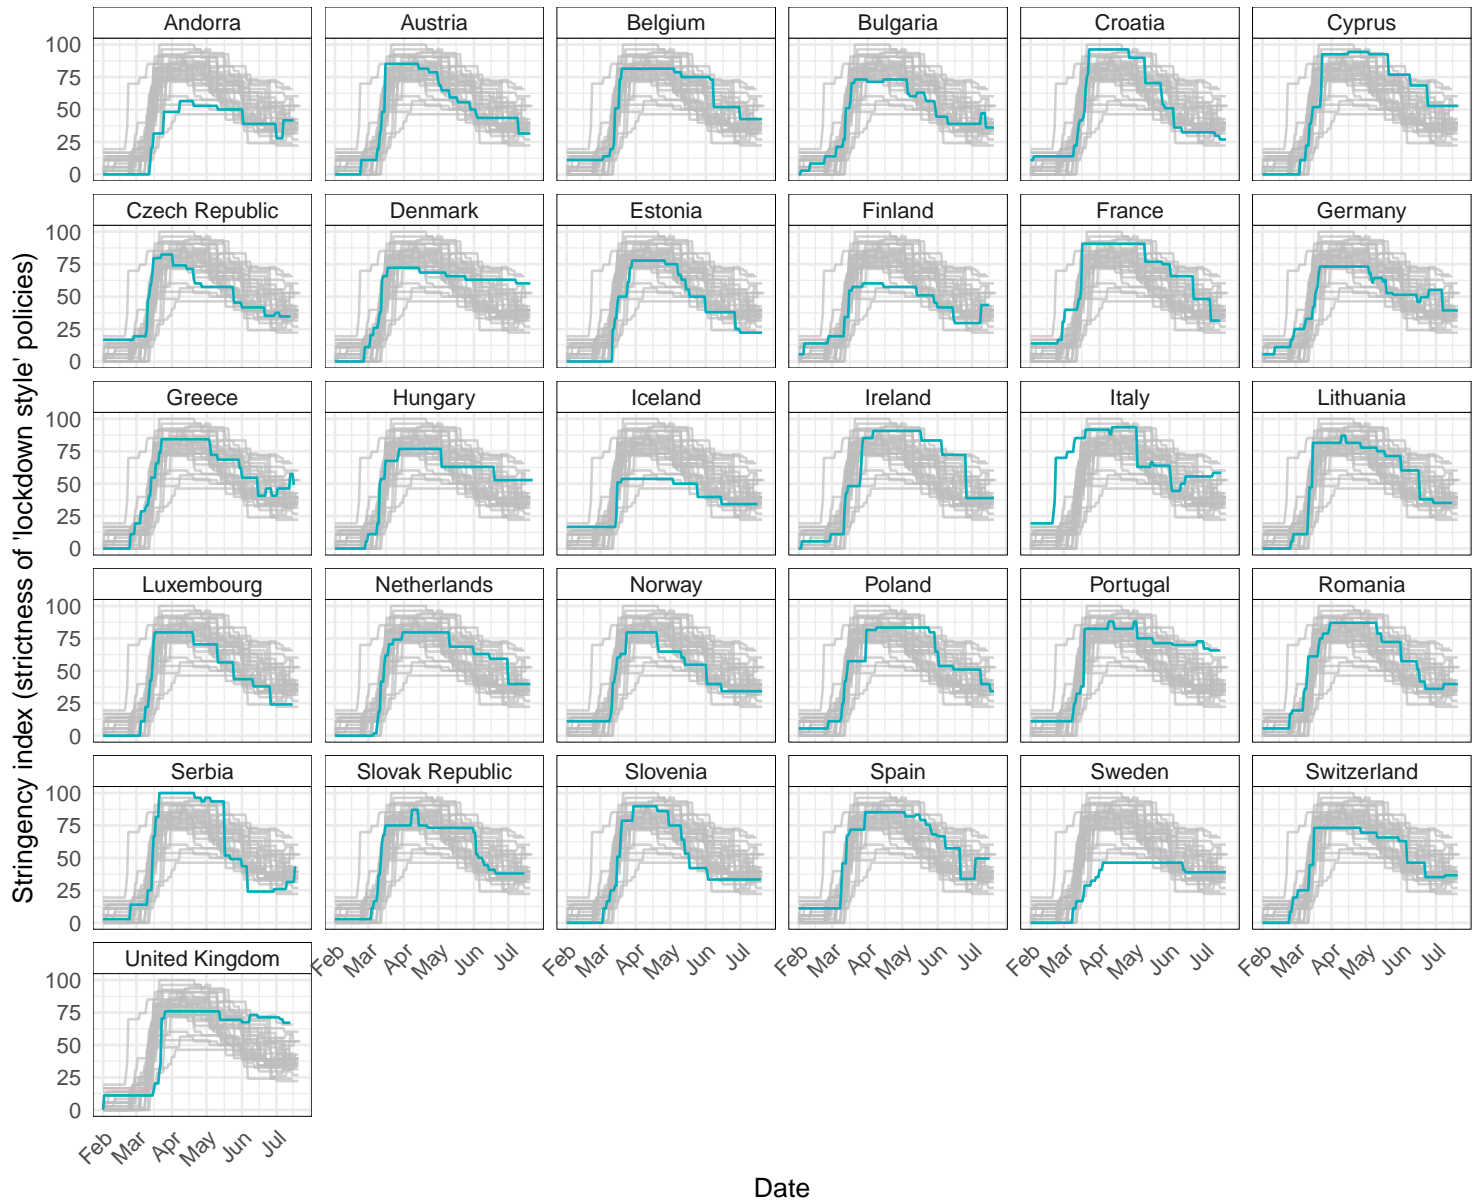

**Figure A2.** Oxford COVID-19 Government Response Tracker's (OxCGRT) stringency index of COVID-19 lockdown measures imposed by different countries' governments between February and July, 2020 (Hale et al., 2020).



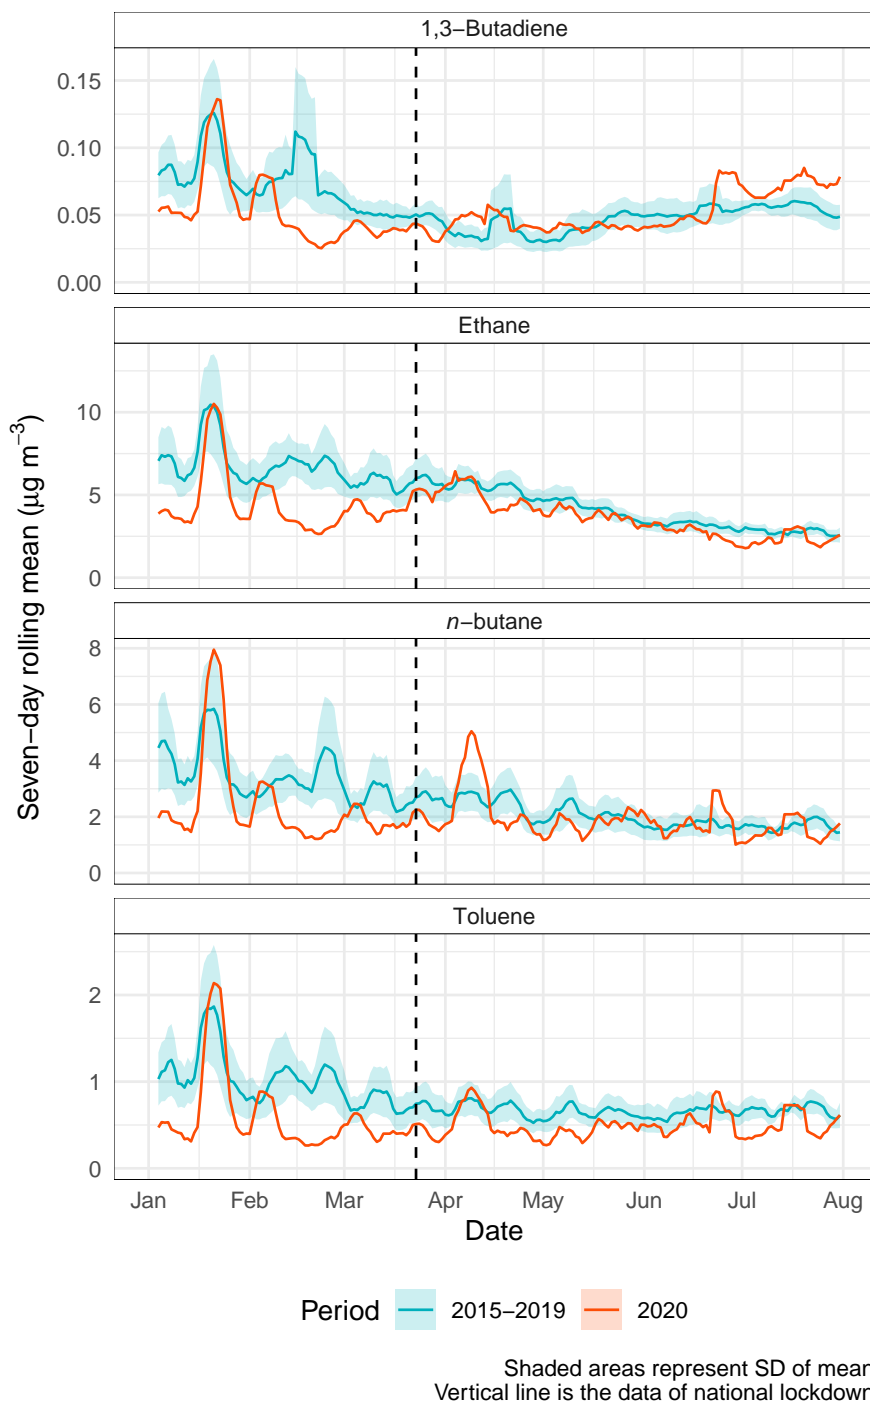

**Figure A3.** Volatile organic compounds (VOCs) time series at London Eltham, an urban-background site in United Kingdom.

## References

- Anenberg, S. C., Miller, J., Minjares, R., Du, L., Henze, D. K., Lacey, F., Malley, C. S., Emberson, L., Franco, V., Klimont, Z., and Heyes, C.: Impacts and mitigation of excess diesel-related NO<sub>x</sub> emissions in 11 major vehicle markets, *Nature*, 545, 467–471, <http://dx.doi.org/10.1038/nature22086>, 2017.
- 350 BBC: Coronavirus: Europe now epicentre of the pandemic, says WHO, <https://www.bbc.com/news/world-europe-51876784>, 13 March 2020., 2020.
- Breiman, L.: Random Forests, *Machine Learning*, 45, 5–32, <https://doi.org/10.1023/A:1010933404324>, <http://dx.doi.org/10.1023/A:1010933404324>, 2001.
- 355 Carslaw, D.: Blog update on COVID-19 and changes in air pollution, <https://ee.ricardo.com/news/blog-update-on-covid-19-and-changes-in-air-pollution>, Ricardo Energy & Environment. 07 May 2020, 2020.
- Carslaw, D. C., Murrells, T. P., Andersson, J., and Keenan, M.: Have vehicle emissions of primary NO<sub>2</sub> peaked?, *Faraday Discussions*, 189, 439–454, <https://doi.org/10.1039/C5FD00162E>, <http://dx.doi.org/10.1039/C5FD00162E>, 2016.
- Carslaw, D. C., Farren, N. J., Vaughan, A. R., Drysdale, W. S., Young, S., and Lee, J. D.: The diminishing importance of nitrogen dioxide emissions from road vehicle exhaust, *Atmospheric Environment: X*, p. 100002, <http://www.sciencedirect.com/science/article/pii/S2590162118300029>, 2019.
- 360 Chang, K.-L., Petropavlovskikh, I., Cooper, O. R., Schultz, M. G., and Wang, T.: Regional trend analysis of surface ozone observations from monitoring networks in eastern North America, Europe and East Asia, *Elementa: Science of the Anthropocene*, 5, 22pp, <https://doi.org/http://doi.org/10.1525/elementa.243>, <https://www.elementalscience.org/articles/10.1525/elementa.243/>, 2017.
- 365 © Google: COVID-19 Community Mobility Reports, <https://www.google.com/covid19/mobility/>, 2020.
- Dehning, J., Zierenberg, J., Spitzner, F. P., Wibral, M., Neto, J. P., Wilczek, M., and Priesemann, V.: Inferring change points in the spread of COVID-19 reveals the effectiveness of interventions, *Science*, p. eabb9789, <http://science.sciencemag.org/content/early/2020/05/14/science.abb9789.abstract>, 2020.
- Department for Environment Food & Rural Affairs: UK AIR Air Information Resource – Automatic Urban and Rural Network (AURN), <https://uk-air.defra.gov.uk/networks/network-info?view=aur>n, 2020.
- 370 European Commission: Air Quality Standards, <https://ec.europa.eu/environment/air/quality/standards.htm>, under Directive 2008/50/EU. Last updated: 31/12/2019., 2019.
- European Environment Agency: Download of air quality data. Download service for E1a and E2a data, <http://discomap.eea.europa.eu/map/fme/AirQualityExport.htm>, 2019.
- 375 Fenech, S., Aquilina, N. J., and Vella, R.: COVID-19-Related Changes in NO<sub>2</sub> and O<sub>3</sub> Concentrations and Associated Health Effects in Malta, *Frontiers in Sustainable Cities*, 3, 1, <https://doi.org/10.3389/frsc.2021.631280>, <https://www.frontiersin.org/article/10.3389/frsc.2021.631280>, 2021.
- Forster, P. M., Forster, H. I., Evans, M. J., Gidden, M. J., Jones, C. D., Keller, C. A., Lamboll, R. D., Quéré, C. L., Rogelj, J., Rosen, D., Schleussner, C.-F., Richardson, T. B., Smith, C. J., and Turnock, S. T.: Current and future global climate impacts resulting from COVID-19, *Nature Climate Change*, <https://doi.org/10.1038/s41558-020-0883-0>, 2020.
- 380 Grange, S. K.: **rmweather**: Tools to Conduct Meteorological Normalisation on Air Quality Data, <https://CRAN.R-project.org/package=rmweather>, R package version 0.1.2, 2018.

- Grange, S. K.: Technical note: **saqgetr** R package, <https://doi.org/10.13140/RG.2.2.15533.44001>, <https://drive.google.com/file/d/1IgDODHqBHewCTKLdAAxRyR7m18ht6Ods/view>, 2019.
- 385 Grange, S. K.: **isdr**: Import NOAA's Integrated Surface Database (ISD) Data, <https://github.com/skgrange/isdr>, R package, 2020.
- Grange, S. K.: Data for publication "COVID-19 lockdowns highlight a risk of increasing ozone pollution in European urban areas", <https://doi.org/10.5281/zenodo.4464734>, <https://doi.org/10.5281/zenodo.4464734>, 2021.
- Grange, S. K. and Carslaw, D. C.: Using meteorological normalisation to detect interventions in air quality time series, *Science of the Total Environment*, 653, 578–588, <http://www.sciencedirect.com/science/article/pii/S004896971834244X>, 2019.
- 390 Grange, S. K., Lewis, A. C., Moller, S. J., and Carslaw, D. C.: Lower vehicular primary emissions of NO<sub>2</sub> in Europe than assumed in policy projections, *Nature Geoscience*, 10, 914–918, <https://doi.org/10.1038/s41561-017-0009-0>, 2017.
- Grange, S. K., Carslaw, D. C., Lewis, A. C., Boleti, E., and Hueglin, C.: Random forest meteorological normalisation models for Swiss PM<sub>10</sub> trend analysis, *Atmospheric Chemistry and Physics*, 18, 6223–6239, <https://doi.org/https://doi.org/10.5194/acp-18-6223-2018>, <https://www.atmos-chem-phys.net/18/6223/2018/>, 2018.
- 395 Grange, S. K., Hüglin, C., and Emmenegger, L.: Influence of COVID-19 lockdowns on Switzerland's air quality, [https://empa-interim.github.io/empa.interim/swiss\\_air\\_quality\\_and\\_covid\\_19.html](https://empa-interim.github.io/empa.interim/swiss_air_quality_and_covid_19.html), Empa's Laboratory for Air Pollution/Environmental Technology, 2020.
- Hale, T., Webster, S., Petherick, A., Phillips, T., and Kira, B.: Oxford Covid-19 Government Response Tracker (OxCGRT), <https://github.com/OxCGRT/covid-policy-tracker>, Blavatnik School of Government, 2020.
- Le Quéré, C., Jackson, R. B., Jones, M. W., Smith, A. J. P., Abernethy, S., Andrew, R. M., De-Gol, A. J., Willis, D. R., Shan, Y., Canadell, J. G., Friedlingstein, P., Creutzig, F., and Peters, G. P.: Temporary reduction in daily global CO<sub>2</sub> emissions during the COVID-19 forced confinement, *Nature Climate Change*, <https://doi.org/10.1038/s41558-020-0797-x>, 2020.
- 400 Lee, J. D., Drysdale, W. S., Finch, D. P., Wilde, S. E., and Palmer, P. I.: UK surface NO<sub>2</sub> levels dropped by 42% during the COVID-19 lockdown: impact on surface O<sub>3</sub>, *Atmospheric Chemistry and Physics Discussions*, 2020, 1–27, <https://acp.copernicus.org/preprints/acp-2020-838/>, 2020.
- 405 Lewis, A. C., Hopkins, J. R., Carslaw, D. C., Hamilton, J. F., Nelson, B. S., Stewart, G., Dernie, J., Passant, N., and Murrells, T.: An increasing role for solvent emissions and implications for future measurements of volatile organic compounds, *Philosophical Transactions of the Royal Society A: Mathematical, Physical and Engineering Sciences*, 378, 20190328, <https://doi.org/10.1098/rsta.2019.0328>, <https://doi.org/10.1098/rsta.2019.0328>, 2020.
- Li, K., Jacob, D. J., Liao, H., Zhu, J., Shah, V., Shen, L., Bates, K. H., Zhang, Q., and Zhai, S.: A two-pollutant strategy for improving ozone and particulate air quality in China, *Nature Geoscience*, 12, 906–910, <https://doi.org/10.1038/s41561-019-0464-x>, <https://doi.org/10.1038/s41561-019-0464-x>, 2019.
- 410 Lindeløv, J. K.: **mcp**: An R Package for Regression With Multiple Change Points, *OSF Preprints*, <https://doi.org/10.31219/osf.io/fzqxv>, 2020.
- Liu, F., Page, A., Strode, S. A., Yoshida, Y., Choi, S., Zheng, B., Lamsal, L. N., Li, C., Krotkov, N. A., Eskes, H., van der A, R., Veefkind, P., Levelt, P. F., Hauser, O. P., and Joiner, J.: Abrupt decline in tropospheric nitrogen dioxide over China after the outbreak of COVID-19, *Science Advances*, <https://doi.org/10.1126/sciadv.abc2992>, <https://advances.sciencemag.org/content/early/2020/06/12/sciadv.abc2992>, 2020.
- 415 Monks, P. S.: A review of the observations and origins of the spring ozone maximum, *Atmospheric Environment*, 34, 3545–3561, <http://www.sciencedirect.com/science/article/pii/S1352231000001291>, 2000.
- NOAA: Integrated Surface Database (ISD), <https://www.ncdc.noaa.gov/isd>, 2016.

- 420 Patel, H., Talbot, N., Salmond, J., Dirks, K., Xie, S., and Davy, P.: Implications for air quality management of changes in air quality during lockdown in Auckland (New Zealand) in response to the 2020 SARS-CoV-2 epidemic, *Science of The Total Environment*, 746, 141–129, <http://www.sciencedirect.com/science/article/pii/S0048969720346581>, 2020.
- Remuzzi, A. and Remuzzi, G.: COVID-19 and Italy: what next?, *The Lancet*, [https://doi.org/10.1016/s0140-6736\(20\)30627-9](https://doi.org/10.1016/s0140-6736(20)30627-9), [https://doi.org/10.1016/S0140-6736\(20\)30627-9](https://doi.org/10.1016/S0140-6736(20)30627-9), 2020.
- 425 Ruktanonchai, N. W., Floyd, J. R., Lai, S., Ruktanonchai, C. W., Sadilek, A., Rente-Lourenco, P., Ben, X., Carioli, A., Gwinn, J., Steele, J. E., Prosper, O., Schneider, A., Oplinger, A., Eastham, P., and Tatem, A. J.: Assessing the impact of coordinated COVID-19 exit strategies across Europe, *Science*, <https://doi.org/10.1126/science.abc5096>, <https://science.sciencemag.org/content/early/2020/07/16/science.abc5096>, 2020.
- Shi, Z., Song, C., Liu, B., Lu, G., Xu, J., Van Vu, T., Elliott, R. J. R., Li, W., Bloss, W. J., and Harrison, R. M.: Abrupt but smaller than  
430 expected changes in surface air quality attributable to COVID-19 lockdowns, *Science Advances*, 7, eabd6696, <http://advances.sciencemag.org/content/7/3/eabd6696.abstract>, 2021.
- Sillman, S.: The relation between ozone, NO<sub>x</sub> and hydrocarbons in urban and polluted rural environments, *Atmospheric Environment*, 33, 1821–1845, <http://www.sciencedirect.com/science/article/pii/S1352231098003458>, 1999.
- Velders, G. J., Willers, S. M., Wesseling, J., van den Elshout, S., van der Swaluw, E., Mooibroek, D., and van Ratingen, S.: Improve-  
435 ments in air quality in the Netherlands during the corona lockdown based on observations and model simulations, *Atmospheric Environment*, 247, 118–158, <https://doi.org/https://doi.org/10.1016/j.atmosenv.2020.118158>, <http://www.sciencedirect.com/science/article/pii/S1352231020308888>, 2021.
- Venter, Z. S., Aunan, K., Chowdhury, S., and Lelieveld, J.: COVID-19 lockdowns cause global air pollution declines, *Proceedings of the National Academy of Sciences*, 117, 18984–18990, <https://doi.org/10.1073/pnas.2006853117>, <https://www.pnas.org/content/117/32/18984>,  
440 2020.
- Wang, T., Xue, L., Brimblecombe, P., Lam, Y. F., Li, L., and Zhang, L.: Ozone pollution in China: A review of concentrations, meteorological influences, chemical precursors, and effects, *Science of The Total Environment*, 575, 1582–1596, <https://doi.org/10.1016/j.scitotenv.2016.10.081>, <http://www.sciencedirect.com/science/article/pii/S0048969716322471>, 2017.
- Wang, Y., Wen, Y., Wang, Y., Zhang, S., Zhang, K. M., Zheng, H., Xing, J., Wu, Y., and Hao, J.: Four-Month Changes in Air  
445 Quality during and after the COVID-19 Lockdown in Six Megacities in China, *Environmental Science and Technology Letters*, <https://doi.org/10.1021/acs.estlett.0c00605>, <https://doi.org/10.1021/acs.estlett.0c00605>, 2020.
- Williams, M. L., Atkinson, R. W., Anderson, H. R., and Kelly, F. J.: Associations between daily mortality in London and combined oxidant capacity, ozone and nitrogen dioxide, *Air Quality, Atmosphere & Health*, 7, 407–414, <https://www.ncbi.nlm.nih.gov/pmc/articles/PMC4239710/>, 2014.
- 450 World Health Organization (WHO): Pneumonia of unknown cause – China, <https://www.who.int/csr/don/05-january-2020-pneumonia-of-unkown-cause-china/en/>, Disease outbreak news. 5 January 2020, 2020a.
- World Health Organization (WHO): WHO Director – General’s opening remarks at the media briefing on COVID-19 – 11 March 2020, <https://www.who.int/dg/speeches/detail/who-director-general-s-opening-remarks-at-the-media-briefing-on-covid-19---11-march-2020>, 11 March 2020, 2020b.
- 455 World Health Organization (WHO): Naming the coronavirus disease (COVID-19) and the virus that causes it, [https://www.who.int/emergencies/diseases/novel-coronavirus-2019/technical-guidance/naming-the-coronavirus-disease-\(covid-2019\)](https://www.who.int/emergencies/diseases/novel-coronavirus-2019/technical-guidance/naming-the-coronavirus-disease-(covid-2019))

[-and-the-virus-that-causes-it](#), Disease: coronavirus disease (COVID-19). Virus: severe acute respiratory syndrome coronavirus 2 (SARS-CoV-2), 2020c.

460 Wu, J. T., Leung, K., and Leung, G. M.: Nowcasting and forecasting the potential domestic and international spread of the 2019-nCoV outbreak originating in Wuhan, China: a modelling study, *The Lancet*, [https://doi.org/10.1016/s0140-6736\(20\)30260-9](https://doi.org/10.1016/s0140-6736(20)30260-9), [https://doi.org/10.1016/S0140-6736\(20\)30260-9](https://doi.org/10.1016/S0140-6736(20)30260-9), 2020.

465 Zhou, P., Yang, X.-L., Wang, X.-G., Hu, B., Zhang, L., Zhang, W., Si, H.-R., Zhu, Y., Li, B., Huang, C.-L., Chen, H.-D., Chen, J., Luo, Y., Guo, H., Jiang, R.-D., Liu, M.-Q., Chen, Y., Shen, X.-R., Wang, X., Zheng, X.-S., Zhao, K., Chen, Q.-J., Deng, F., Liu, L.-L., Yan, B., Zhan, F.-X., Wang, Y.-Y., Xiao, G.-F., and Shi, Z.-L.: A pneumonia outbreak associated with a new coronavirus of probable bat origin, *Nature*, 579, 270–273, <https://doi.org/10.1038/s41586-020-2012-7>, 2020.
